# Supplementary material for: Augmin deficiency in neural stem cells causes p53-dependent apoptosis and aborts brain development
Source: eLife. 2021 Aug 24;10:e67989. doi: 10.7554/eLife.67989 (PMC8456695; doi:10.7554/eLife.67989)
Supplement: Figure 1—source data 1. [file elife-67989-fig1-data1.xlsx]

## Sheet: Fig1f
Genotype	Control			Haus6 cKO
Embryo #	Ctr-1	Ctr-2	Ctr-3	cKO-1	cKO-2	cKO-3	cKO-4	cKO-5
Thalamus thickness	374.5	431	460	185.5	111.25	124.25	129.75	129.25
Pax6 layer thickness	87	51.72	69	108.25	94	104.25	105.75	107.25
beta3tub layer thickness	287.5	366.35	386.4	74.5	16.25	22.25	27	23.25
% Pax6 layer	0.23231	0.12	0.15	0.583558	0.844944	0.839034	0.815029	0.829787
%beta 3 tub layer	0.76769	0.85	0.84	0.401617	0.146067	0.179074	0.208092	0.179884
>> DATA SUMMARY:
Genotype	Control			Haus6 cKO			t.test Ctr vs Haus6 cKO
	Average	St.Dev		Average	St Dev.		P value
Thalamus Thickness	421.833	43.4808		136	28.6596		2.72503e-05	***
Pax6 layer thickness	69.24	17.6412		103.9	5.73803		0.0054799	**
beta3tub layer thickness	346.75	52.2821		32.65	23.7109		2.03681e-05	***
% Pax6 layer	0.167437	0.0581498		0.78247	0.111767		0.000130644	***
%beta 3 tub layer	0.81923	0.044914		0.222947	0.102266		8.54556e-05	***
