# Supplementary material for: Augmin deficiency in neural stem cells causes p53-dependent apoptosis and aborts brain development
Source: eLife. 2021 Aug 24;10:e67989. doi: 10.7554/eLife.67989 (PMC8456695; doi:10.7554/eLife.67989)
Supplement: Figure 2—figure supplement 1—source data 1. [file elife-67989-fig2-figsupp1-data1.xlsx]

## Sheet: Fig2-supplement 1d
		>> Raw Data; DATA SUMMAR at the bottom
E11.5
		cortex				cortex						cortex
	Genotype:	Haus6 cKO				Haus6 cKO						Control					Control						Control
	Embryo #:	cKO - 1				cKO - 2						Ctr - 1					Ctr - 2						Ctr - 3
	Section #:	cKO - 1.1	cKO - 1.2	cKO - 1.3		cKO - 2.1	cKO - 2.2	cKO - 2.3	cKO - 2.4	cKO - 2.5		Ctr - 1.1	Ctr - 1.2	Ctr - 1.3	Ctr - 1.4		Ctr - 2.1	Ctr - 2.2	Ctr - 2.3	Ctr - 2.4	Ctr - 2.5		Ctr - 3.1	Ctr - 3.2	Ctr - 3.3	Ctr - 3.4
	Column width analysed: (um)	415	439	458		266	388	448	309	281		309	421	418	430		222	325	295	295	347		322	200	304	248
	Distance to VZ for each cell analysed: (um)	11	6	10		7	6	7	5	7		7	34	21	6		7	12	119	7	9		7	6	9	8
		27	11	5		10	5	11	20	8		9	7	10	19		5	23	132	14	9		9	22	14	6
		9	11	4		5	5	9	6	9		5	21	22	16		29	6	10	12	11		152	114	9	8
		5	9	8		5	16	6	14	17		15	33	128	10		12	9	12	10	10		133	158	7	22
		14	9	16		4	25	7	18	94		8	8	13	5		10	15	10	11	4		11	8	13	11
		9	5	7		5	12	10	7	79		10	8	12	19		24	5	11	9	7		9	6	14	5
		16	14	18		8	8	10	13	9		10	9	11	10		9	10	7	8	15		8	8	16	9
		6	22	7		23	20	6	89	8		11	3	20	9		14	3	17	4	14		7	10	8	5
		13	13	12		3	10	7	3	90		12	9	21	5		121	16	10	9	9		9	10	7	7
		6	9	5		15	5	15	12	84		19	26	32	13		5	8	11	9	8		10	32	5	7
		19	20	14		16	4	4	4	10		9	7	7	17		6	8	10	7	8		10	95	7	6
		2	7	15		4	19	7	15	10		12	21	6	13		4	16	9	6	8		8	113	4	7
		8	16	5		8	6	8	7	8		126	169	21	14		20	10	10	10	20		9	16	6	4
		93	8	8		4	5	13	16	10		107	9	8	14		8	6	20	6	60		6	7	4	13
		112	9	7		6	21	4	9	23			9	6	17		17	8	7	20	100		9	11	6	4
		7	9	5		7	7	7	10	74			9	11	10		5	19	7	6	9		5	141	17	9
		11	8	6		4	14	6	9	8			8	26	21		10	11	5	3	12		7	146	6	12
		6	8	9		9	7	5	5	6			83	18	6		10	100	123	8	12		13	4	7	4
		7	8	10		18	6	5	7	11			10	12	43		132			8	11		5	8	6	6
		23	9	4		31	9	6	6	7			42	21	6					13	10		8	8	4	8
		12	3	4		5	7	24	98	84			153	120	17					102	12		135	144	6	6
		7	7	8		11	10	7	6	8			12	7	28					90	10		8	128	11	90
		87	36	15		4	7	50	8	7			6	14	38					71			10	11	26	32
		10	119	4		19	7	6	7	6			9	10	26								3	9	110	113
		6	8	11		9	9	5	88	4			6	29	7								66	9	132	125
		22	4	24		6	8	7	105	13			23	11	14								6	8	138	134
		9	8	55		8	11	7	6	4			8	8	10								10	12	135	79
		5	8	158		4	6	80	16	12			5	11	9									139	138
		19	5	154		4	17	92	7	15			9	17	45									147	134
		8	9	191		3	5	7	9	6			21	17	10										131
		21	3	153		8	3	8	6				8	13	12										135
		9	4	101		54	12	9	7				8	28	5
		113	8	169		105	4	7	12				16		21
		8	10	179			5	9	95				6		6
		11	4	9			6	9	105						10
		19	21	4			9	5	4						22
		9	5	4			21	9	14						9
		26	4	13			6	19	6						17
		13	6	19			8	6	6						29
		9	6	2			5	12	17						14
		127	8	6			9	5	7						18
		121	17	17			12	9	9						20
		99	7	7			10	8							12
		10	14	16			6	34							11
		17	8	18			10	26							11
		8	8	23			3	8							17
		10	14	27			4	7							20
		13	7	10			11	26							130
		11	4	7			3	24							155
		5	7	11			10	101							154
		14	106	6			7								162
		18	93	15			16								111
		28	21	33											131
		5	5	8											159
		9	16	4											163
		21	7	17											132
		7	7	126
		9	6	154
		8	8	181
		8	8	186
		18	7	195
		7	5	210
		8	12	183
		19	17	198
		102	7	183
		110	5	12
		73	9	9
		111	17	25
		125	81	9
		136	35	21
		123	69	40
		134	86	109
			103	7
				9
				27
				37
				35
				47
				6
				12
				5
				18
				99
				8
				7
				8
				18
				26
				10
				15
				15
				13
				33
				10
				31
				155
				149
				110
				42
				34
				156
				126
				163
				185
				186
				195
				43
				193
Genotype:		Haus6 cKO				Haus6 cKO						Control					Control						Control
Embryo #:		cKO - 1				cKO - 2						Ctr - 1					Ctr - 2						Ctr - 3
	Distance to VZ (um):
Average per embryo: values # mitosis per 100um column:	0-30	14.4817				11.052						7.16096					5.9973						7.91434
	>30	4.80183				1.18203						1.45754					0.74124						2.70019
		Haus6 cKO		Control			Average		Stdev		t.test (Control vs Haus6 cKO) - P-value:
	Embryo #:	cKO - 1	cKO - 2	Ctr - 1	Ctr - 2	Ctr - 3	Haus6 cKO	Control	Haus6 cKO	Control
	Distance from VZ:
	0-30	14.4817	11.052	7.16096	5.9973	7.91434	12.7669	7.0242	2.42516	0.965807	0.0296296	*
	>30	4.80183	1.18203	1.45754	0.74124	2.70019	2.99193	1.63299	2.55958	0.991188	0.442013	ns

## Sheet: Fig2-supplement 1e
	>> RAW DATA - DATA SUMMARY BELOW
	Genotype:	Haus6 cKO			Haus6 cKO			Control			Control			Control			Control
	Animal:	cKO - 1			cKO - 2			Ctr - 1			Ctr - 2			Ctr - 3			Ctr - 4
		# phases	% phases		# phases	% phases		# phases	% phases		# phases	% phases		# phases	% phases		# phases	% phases
	Prophase	8	0.0645161		10	0.0847458		13	0.12037		20	0.186916		25	0.231481		25	0.193798
	Prometaphase	69	0.556452		59	0.5		40	0.37037		33	0.308411		26	0.240741		37	0.286822
	Metaphase	30	0.241935		35	0.29661		31	0.287037		28	0.261682		23	0.212963		32	0.248062
	Anaphase	5	0.0403226		8	0.0677966		8	0.0740741		10	0.0934579		12	0.111111		17	0.131783
	Telophase	2	0.016129		2	0.0169492		12	0.111111		9	0.0841121		16	0.148148		13	0.100775
	Anaphase + Telophase		0.0564516			0.0847458			0.185185			0.17757			0.259259			0.232558
	Monopolar	10	0.0806452		4	0.0338983		4	0.037037		7	0.0654206		6	0.0555556		5	0.0387597
	Total # mitosis	124			118			108			107			108			129
	>> DATA SUMMARY
		Haus6 cKO				Control
	Embryo #:	cKO - 1	cKO - 2	Average	St Dev	Ctr - 1	Ctr - 2	Ctr - 3	Ctr - 4	Average	St Dev	t.test (Control vs Haus6 cKO) - P-value:
% of total mitotic figures	Prophase	0.0645161	0.0847458	0.0746309	0.0143045	0.12037	0.186916	0.231481	0.193798	0.183142	0.0462053	0.0368451	*
	Prometaphase	0.556452	0.5	0.528226	0.0399173	0.37037	0.308411	0.240741	0.286822	0.301586	0.0538455	0.00670084	**
	Metaphase	0.241935	0.29661	0.269273	0.0386608	0.287037	0.261682	0.212963	0.248062	0.252436	0.030876	0.58738
	Ana/Telophase	0.0564516	0.0847458	0.0705987	0.020007	0.185185	0.17757	0.259259	0.232558	0.213643	0.0389432	0.0093406	**
	Monopolar	0.0806452	0.0338983	0.0572717	0.033055	0.037037	0.0654206	0.0555556	0.0387597	0.0491932	0.0136679	0.670157

## Sheet: Fig2-supplement 1g
			mitotic cells counted with # centrin foci									mean
	Genotype	Embryo	<3	3-4	>4		total	% <3	% 3-4	% >4		% <3	% 3-4	% >4		SD				T-test
	Control	#1	1	18	0		19	5.26316	94.7368	0		5.07229	94.9277	0		1.28383	1.28383	0		0.315478	0.00852279	0.373901
		#2	2	30	0		32	6.25	93.75	0
		#3	1	26	0		27	3.7037	96.2963	0
	Haus6 cKO	#1	1	37	3		41	2.43902	90.2439	7.31707		9.02122	88.5398	2.43902		5.82553	1.90288	4.22451
		#2	4	32	0		36	11.1111	88.8889	0
		#3	5	32	0		37	13.5135	86.4865	0

## Sheet: Fig2-supplement 1i
>spindle orientation in metaphase, anaphase and telophase dividing close to the VS
> E11.5 CORTEX
				Control				Haus6 cKO
			Embryo #:	Ctr - 1	Ctr - 2	Ctr - 3	Ctr - 4	cKO - 1	cKO - 2
			Spindle angles from analysed cells:	55	82	64	86	77	76
				86	59	71	85	33	60
				87	87	86	15	52	53
				88	80	76	90	78	82
				49	89	75	75	80	61
				81	74	90	78	86	85
				89	79	90	78	86	17
				86	85	85	90	79	81
				62	74	89	74	84	72
				25	57	89	49	55	79
				63	73	81	78	70	82
				56	88	61	88	75	86
				90	76	87	68	71	44
				67	76	89	76	42	86
				88	40	76	81	75	60
				88	41	84	75	84	89
				85	87	88	90	50	67
				82	90	53	89	84	81
				88	59	90	78	78	88
					90	90	88		42
						89			84
						85			88
						85			64
						82			84
						85			77
									77
	> DATA SUMMARY
	Genotype:	Control					Haus6 cKO
	Embryo:	Ctr - 1	Ctr - 2	Ctr - 3	Ctr - 4	Average	cKO - 1	cKO - 2	Average	t.test (Control vs Haus6 cKO) - P-value:
	Spindle angle:
	90-75	0.631579	0.6	0.84	0.8	0.717895	0.631579	0.615385	0.623482	0.353023	ns
	75-60	0.157895	0.15	0.12	0.1	0.131974	0.105263	0.230769	0.168016	0.452814	ns
	60-45	0.157895	0.15	0.04	0.05	0.0994737	0.157895	0.0384615	0.0981781	0.983758	ns
	45-30	0	0.1	0	0	0.025	0.105263	0.0769231	0.0910931	0.161094	ns
	30-15	0.0526316	0	0	0.05	0.0256579	0	0.0384615	0.0192308	0.810981	ns
	15-0	0	0	0	0	0	0	0	0	#DIV/0!

## Sheet: Fig2-supplement 1j
>spindle orientation in metaphase, anaphase and telophase dividing close to the VS
> E13.5 THALAMUS
			> RAW DATA; DATA SUMMARY below
			Genotype:	Control				Haus6 cKO
			Spindle angles from analysed cells:	CX96/01	CX96/04	CX110_02_3	CX134N_03 G2	CX40_01_4	CX40_04	CX40_07 cap10	CX140_03_10	CX140_04_10
				86	65	65	13	88	49	86	65	90
				11	46	79	86	83	75	89	86	87
				55	81	70	82	21	88	62	55	88
				49	82	74	83	11	34	18	70	85
				71	82	85	80	74	86	90	59	54
				69	82	84	86	87	71	74	56	79
				77	61	76	88	55	67	58	79	75
				24	54	83	83	79	81	52	78	80
				89	77	71	88	52	86	68	44	73
				86	90	88	71	40	78	89	47	57
				88	85	75	77	82	86	86	85	71
				78	25	85	73	69	73	74	54	64
				55	83	90	46	86	54	82	57	44
				86	46	40	72	87	80	63	46	47
				79	83	80	70	56	51	69	15
					54	43	82	71	75	27	59
					68	52	74		84	71	82
					77	7	53		77	59	68
					87	75	88		74	55	80
					88	82	60		80	79	80
					75	59	71		72	19	65
					73	63			62	81	67
					66	63			35	55
						83			82	74
						90			76	78
						89			86	61
										75
										77
										37
										76
										31
										80
										71
										73
										83
	>> DATA SUMMARY:
	Genotype:	Control					Haus6 cKO
	Embryo #:	Ctr - 1	Ctr - 2	Ctr - 3	Ctr - 4	Average	cKO - 1	cKO - 2	cKO - 3	cKO - 4	cKO - 5	Average
Spindle angle:	90-75º	0.533333	0.521739	0.5	0.52381	0.51972	0.4375	0.5	0.371429	0.318182	0.428571	0.411136
	75-60º	0.133333	0.26087	0.307692	0.285714	0.246902	0.1875	0.307692	0.342857	0.227273	0.285714	0.270207
	60-45º	0.2	0.173913	0.0769231	0.142857	0.148423	0.1875	0.115385	0.142857	0.363636	0.214286	0.204733
	45-30º	0	0	0.0769231	0	0.0192308	0.0625	0.0769231	0.0571429	0.0454545	0.0714286	0.0626898
	30-15º	0.0666667	0.0434783	0	0	0.0275362	0.0625	0	0.0857143	0	0	0.0296429
	15-0º	0.0666667	0	0.0384615	0.047619	0.0381868	0.0625	0	0	0.0454545	0	0.0215909
