# Supplementary material for: Augmin deficiency in neural stem cells causes p53-dependent apoptosis and aborts brain development
Source: eLife. 2021 Aug 24;10:e67989. doi: 10.7554/eLife.67989 (PMC8456695; doi:10.7554/eLife.67989)
Supplement: Figure 2—figure supplement 2—source data 1. [file elife-67989-fig2-figsupp2-data1.xlsx]

## Sheet: Fig2-supplement 2b
THALAMUS e13.5
Genotype	Control															Genotype	Haus6 cKO
Embryo #:	Ctr - 1					Ctr - 2					Ctr - 3					Animal	cKO - 1					cKO - 2					cKO - 3				cKO - 4				cKO - 5
Section #:	Ctr - 1.1	Ctr - 1.2	Ctr - 1.3	Average		Ctr - 2.1	Ctr - 2.2	Ctr - 2.3	Average		Ctr - 3.1	Ctr - 3.2	Ctr - 3.3	Average		Cut	cKO - 1.1	cKO - 1.2	cKO - 1.3	Average		cKO - 2.1	cKO - 2.2	cKO - 2.3	Average		cKO - 3.1	cKO - 3.2	Average		cKO - 4.1	cKO - 4.2	Average		cKO - 5.1	cKO - 5.2	Average
Total # cells	5653	6138	7878			3943	4395	4545			3000	5228	7680			Total # cells	1616	10167	6129			2349	2189	1366			1707	3263			1757	2042			3811	4667
p21 + cells	183	95	107			140	132	123			160	156	173			p21 + cells	331	1605	777			547	500	343			168	219			265	285			387	533
% cell, p21+	0.0323722	0.0154774	0.0135821	0.0204772		0.035506	0.0300341	0.0270627	0.0308676		0.0533333	0.0298393	0.022526	0.0352329		% cell, p21+	0.204827	0.157864	0.126774	0.163155		0.232865	0.228415	0.251098	0.237459		0.0984183	0.0671162	0.0827672		0.150825	0.139569	0.145197		0.101548	0.114206	0.107877
Average % p21+ cells per embryo:				0.0204772					0.0308676					0.0352329						0.163155					0.237459				0.0827672				0.145197				0.107877
DATA SUMMARY:
Genotype:	n	%p21 + average	% p21+ st dev	t.test (Control vs Haus6 cKO) - P-value:
Control	3	0.0288592	0.00758008
Haus6 cKO	5	0.147291	0.0593783	0.0157795	*
