# Supplementary material for: Augmin deficiency in neural stem cells causes p53-dependent apoptosis and aborts brain development
Source: eLife. 2021 Aug 24;10:e67989. doi: 10.7554/eLife.67989 (PMC8456695; doi:10.7554/eLife.67989)
Supplement: Figure 2—source data 1. [file elife-67989-fig2-data1.xlsx]

## Sheet: Fig2b
		>> Raw Data; DATA SUMMARY at the bottom
>> Summary of results at the bottom of this sheet		genotype		Control			Control				Control			Control			Haus6 cKO			Haus6 cKO				Haus6 cKO		Haus6 cKO
		Embryo #		Ctr - 1			Ctr - 2				Ctr - 3			Ctr - 4			cKO 1			cKO 2				cKO 3		cKO 4
		Section #		Ctr - 1.1	Ctr - 1.2	Ctr - 1.3	Ctr - 2.1	Ctr - 2.2	Ctr - 2.3	Ctr - 2.4	Ctr - 3.1	Ctr - 3.2	Ctr - 3.3	Ctr - 4.1	Ctr - 4.2	Ctr - 4.3	cKO 1.1	cKO 1.2	cKO 1.3	cKO 2.1	cKO 2.2	cKO 2.3	cKO 2.4	cKO 3.1	cKO 3.2	cKO 4.1	cKO 4.2
		Column width analysed		301	310	449	386	515	516	515	517	523	521	301	310	449	268	343	451	494	593	398	607	398	382	437	412
		Distance to VZ for each cell analysed		9	7	7
				11	7	12	14	7	5	7	8	7	8	9	7	7	8	11	4	3	11	62	94	62	7	131	106
				10	32	6	7	7	8	8	7	15	10	11	7	12	11	6	7	13	8	9	14	9	21	27	41
				8	104	8	5	9	5	43	7	14	7	10	32	6	16	7	6	20	18	7	9	7	9	7	8
				5	94	5	8	23	73	91	4	11	6	8	104	8	8	8	4	8	31	8	6	8	5	4	3
				9	114	7	6	79	92	26	6	155	8	5	94	5	33	9	16	6	5	8	15	8	6	11	13
				10	8	5	9	84	256	45	8	12	7	9	114	7	4	9	8	7	7	7	55	7	8	13	6
					7	5	31	80	282	70	8	148	10	10	8	5	16	6	25	4	16	7	38	7	9	7	3
				9	15	11	6	75	6	85	8	8	9	7	7	5	10	11	10	43	25	5	7	5	5	14	9
				16	11	9	6	6	6	5	6	12	7	9	15	11	23	3	13	14	14	7	18	7	21	25	21
				5	13	8	4	9	28	6		9	7	16	11	9	5	19	8	13	17	5	9	5	9	23	4
				6	8	7	10	9	3	7			8	5	13	8	26	5	17	6	26	6	9	6	7	115	16
				6	112	7	7	8	6	11			9	6	8	7	17	10	6	5	19	6	4	6	8	92	7
				6	8	114		8	20	27			7	6	112	7	3	7	9	7	3	20	18	20	14	6	6
					5	129		36	43	86			6	6	8	114	19	9	18	7	12	10	16	10	5	4	19
					9	102		4	91	89					5	129	16	29	14	11	40	6	6	6	11	8	5
						119		7	91	88					9	102	4	3	6	7	41	6	15	6	5	6	8
						141			70	66						119	9	7	22	9	32	9	28	9	5	8	17
						162			78	65						141	7	11	25	11	14	7	18	7	6	8	5
									84	5						162	13	5	18	13	27	9	4	9	7	7	6
									88	31							12	8	36	7	41	4	12	4	6	15	3
									4	26							5	15	20	10	11	5	6	5	5	6	5
									7	8							13	11	5	6	5	13	11	13	5	6	9
																	38	8	10	20	22	4	15	4	8	18	4
																	61	9	13	8	24	7	6	7	8	4	8
																	7	5	6	10	35	9	7	9	29	7	9
																	18	7	8	26	16	28	9	28	11	8	6
																	21	8	6	8	9	5	20	5	7	10	6
																	18	6	20	16	12	8	23	8	7	5	5
																	3	18	10	7	24	8	12	8	6	7	11
																	12	6	7	20	20	10	7	10	9	6	4
																	16	4	15	15	35	7	17	7		19	6
																	24	6	7	7	6	9	10	9		6	21
																	5	19	12	9	11	8	11	8		6	7
																	13	3	20	23	7	8	12	8		8	5
																	9	19	7	5	17	9	7	9		8	5
																	4	7	13	22	26	13	25	13		6	11
																	11	6	8	14	28	5	16	5		59	11
																	4	7	8	118	9	7	5	7		7	6
																	25	9	10	10	30	9	12	9		15	5
																	18	8	15	7	46	9	19	9		5	8
																	14	9	38		21	5	11	5		4	8
																	3	75	3		14	11	17	11		3	9
																	12	137	11		27		17			3	81
																	7	125	29		9		4			6	4
																	5	119	3		26		23			6	4
																	6	127	5		5		22			3	7
																	6		13		21		32			14
																	6		15		16		25			2
																			10		27		14			8
																			10		31		8			9
																			8		4		16			122
																			124		21		5			127
																			119		34		24			8
																			124		7		16			11
																			111		30		13			123
																			13		18		13			68
																			10		30		36			28
																			22		3		16			22
																			41		13		10			14
																			7		19		34			20
																			14		11		15			9
																			8		19		22			17
																			17		34		14			25
																			7		13		21			11
																			11		6		32
																			16		13		39
																			13		5		20
																			9		22		20
																			26		48		22
																			6		19		31
																			11		25		87
																			12		31		54
																					78		13
																					5		5
																					26		12
																					4		27
																					13		24
																					23		52
																					37		18
																					14		12
																					26		30
																					4		9
																					16		35
																					24		8
																					4		33
																					24		24
																					15		16
																					16		9
																					13		27
																					30		15
																					18		13
																					14		6
																					13		9
																					18		6
																					47		9
																					54		173
																					11		156
																					21		161
																					33		146
																					34		12
																					43		22
																					23		21
																					5		58
																					29		21
																					16
																					32
																					12
																					20
																					10
																					17
																					29
																					29
																					9
																					17
																					25
																					32
																					25
																					7
																					10
																					20
																					22
																					7
																					19
																					6
																					20
																					14
																					17
																					16
																					7
																					27
																					4
																					9
																					36
																					8
																					5
																					41
																					7
																					13
																					12
																					10
																					111
																					102
																					98
																					152
																					176
																					174
																					258
																					126
																					104
																					150
																					180
																					202
																					165
																					193
																					209
																					211
																					216
																					230
																					228
																					53
																					66
																					26
																					23
		genotype		Control													Haus6 cKO
		Embryo #		Ctr - 1			Ctr - 2				Ctr - 3			Ctr - 4			cKO 1			cKO 2				cKO 3		cKO 4
			Distance from VZ (um)
		Mitotic cell density: (# mitotic cells / 100 um column width)	0-30	3.49057			2.27743				1.98591			3.58491			14.2185			13.2409				9.10256		11.6608
			>30	1.03774			1.44928				0.128123			1.03774			1.41243			3.44168				0.128205		1.83066
		Data Summary:
			Genotype	Haus6 cKO		Control		t.test
		Mitotic cell density: (# mitotic cells / 100 um column width)	Distance from VZ (um)	Average	st dev	Average	st dev	P-value
			0-30	12.0557	2.23303	2.8347	0.821374	0.000242385	***
			>30	1.70325	1.36671	0.913218	0.558194	0.325649	ns

## Sheet: Fig2c
	Genotype:	Haus6 cKO										Control
	Embryo:	cKO - 1		cKO - 2		cKO - 3		cKO - 4		cKO - 5		Ctr - 1		Ctr - 2		Ctr - 3		Ctr - 4
		# phases	% phases	# phases	% phases	# phases	% phases	# phases	% phases	# phases	% phases	# phases	% phases	# phases	% phases	# phases	% phases	# phases	% phases
	Prophase	16	0.129032	5	0.0806452	7	0.1	3	0.0357143	7	0.0804598	9	0.142857	12	0.173913	8	0.121212	9	0.142857
	Prometaphase	75	0.604839	35	0.564516	36	0.514286	61	0.72619	50	0.574713	27	0.428571	23	0.333333	22	0.333333	21	0.333333
	Metaphase	27	0.217742	15	0.241935	18	0.257143	12	0.142857	23	0.264368	21	0.333333	18	0.26087	22	0.333333	19	0.301587
	Anaphase	2	0.016129	2	0.0322581	4	0.0571429	1	0.0119048	3	0.0344828	5	0.0793651	5	0.0724638	4	0.0606061	5	0.0793651
	Telophase	0	0	3	0.0483871	2	0.0285714	2	0.0238095	2	0.0229885	1	0.015873	6	0.0869565	6	0.0909091	4	0.0634921
	Ana+Telophase		0.016129		0.0806452		0.0857143		0.0357143		0.0574713		0.0952381		0.15942		0.151515		0.142857
	Monopolar	4	0.0322581	2	0.0322581	3	0.0428571	5	0.0595238	2	0.0229885	0	0	5	0.0724638	4	0.0606061	5	0.0793651
	Total mitosis	124		62		70		84		87		63		69		66		63
	Pro/Prometaphase		0.766129		0.677419		0.657143		0.821429		0.678161		0.571429		0.57971		0.515152		0.555556
	Meta/Ana/Telophase		0.233871		0.322581		0.342857		0.178571		0.321839		0.428571		0.42029		0.484848		0.444444
	Pro/Prometaphase/Metaphase		0.951613		0.887097		0.871429		0.904762		0.91954		0.904762		0.768116		0.787879		0.777778
SUMMARY RESULTS:
		Haus6 cKO							Control
		cKO - 1	cKO - 2	cKO - 3	cKO - 4	cKO - 5	Average	St Dev	Ctr -1	Ctr - 2	Ctr - 3	Ctr -4	Average	St Dev	t.test
% phases	Prophase	0.129032	0.0806452	0.1	0.0357143	0.0804598	0.0851703	0.0340307	0.142857	0.173913	0.121212	0.142857	0.14521	0.0216859	0.018685	*
	Prometaphase	0.604839	0.564516	0.514286	0.72619	0.574713	0.596909	0.0792861	0.428571	0.333333	0.333333	0.333333	0.357143	0.047619	0.00113483	**
	Metaphase	0.217742	0.241935	0.257143	0.142857	0.264368	0.224809	0.0491674	0.333333	0.26087	0.333333	0.301587	0.307281	0.03437	0.0254179	*
	Ana/Telophase	0.016129	0.0806452	0.0857143	0.0357143	0.0574713	0.0551348	0.0295379	0.0952381	0.15942	0.151515	0.142857	0.137258	0.0288181	0.00409631	**
	Monopolar	0.0322581	0.0322581	0.0428571	0.0595238	0.0229885	0.0379771	0.0139477	0	0.0724638	0.0606061	0.0793651	0.0531087	0.0362434	0.413763	ns

## Sheet: Fig2e
	E13.5				%fragmented centrosomes
	Genotype	Embryo:	fragmented centrosomes	non-fragmented
	Haus6 cKO	cKO - 1	13	18	0.419355
	Haus6 cKO	cKO - 2	41	28	0.594203
	Haus6 cKO	cKO - 3	21	10	0.677419
	Haus6 cKO	cKO - 4	18	18	0.5
	Haus6 cKO	cKO - 5	19	12	0.612903
	Control	Ctr - 1	3	31	0.0882353
	Control	Ctr - 2	5	33	0.131579
	Control	Ctr - 3	6	17	0.26087
	Control	Ctr - 4	1	17	0.0555556
	Control	Ctr - 5	2	20	0.0909091
	SUMMARY RESULTS	% fragmented centrosomes
		Average	St dev	t test - P value
	Control	0.12543	0.080373	Control vs Haus6 cKO
	Haus6 cKO	0.560776	0.0896474	6.77776e-05	***

## Sheet: Fig2g
Genotype	Embryo #	# bipolar spindles	# disorganised or no spindles	% Abnormal/ bipolar asters
Control	Ctr - 1	26	5	0.16129
Control	Ctr - 2	23	8	0.258065
Control	Ctr - 3	25	5	0.166667
Control	Ctr - 4	24	6	0.2
Control	Ctr - 5	26	4	0.133333
Haus6 cKO	cKO - 1	22	9	0.290323
Haus6 cKO	cKO - 2	13	14	0.518519
Haus6 cKO	cKO - 3	13	19	0.59375
SUMMARY RESULTS:
		% fragmented centrosomes
	Genotype:	Average	St dev	t test - P value
	Control	0.183871	0.0477618	Control vs Haus6 cKO
	Haus6 cKO	0.46753	0.0644534	0.00784703	**

## Sheet: Fig. 2i
	Genotype	Embryo	pH3 positive cells counted	no spindles			% no spindles	mean % no spindles		SD	T-test
	WT	#1	88	7			7.95455	6.36092		1.44732	0.000395517
		#2	78	4			5.12821
		#3	50	3			6
	Haus6 cKO	#1	52	10			19.2308	20.5075		2.59598
		#2	99	22			22.2222
		#3	52	12			23.0769
		#4	40	7			17.5

## Sheet: Fig2k
		genotype	Haus6 cKO												Control
		Embryo #:	cKO - 1				cKO - 2		cKO - 3						Ctr - 1			Ctr - 2		Ctr - 3			Ctr - 4
		Section #:	cKO - 1.1	cKO - 1.2	cKO - 1.3	cKO - 1.4	cKO - 2.1	cKO - 2.2	cKO - 3.1	cKO - 3.2	cKO - 3.3	cKO - 3.4	cKO - 3.5		Ctr - 1.1	Ctr - 1.2	Ctr - 1.3	Ctr - 2.1	Ctr - 2.2	Ctr - 3.1	Ctr - 3.2	Ctr - 3.3	Ctr - 4.1	Ctr - 4.2
		Area (100 um)2	2.5342	2.8653	3.3428	2.1987	2.779	1.8387	2.24	2.2109	2.24	2.43	1.65		3.3966	8.1037	10.3448	2.3264	4.294	7.5563	18.01	13.2	12.42	27.12
		# p53 + cells	81	68	71	85	70	65	11	84	51	56	39		3	14	15	9	15	12	16	10	5	23
		# Cleaved C3 + cells	148	169	110	125	60	71	7	63	40	76	35		4	23	10			8	11	7	1	14
		p53 + cell density	31.9627	23.7322	21.2397	38.6592	25.1889	35.3511	4.91071	37.9936	22.7679	23.0453	23.6364		0.883236	1.72761	1.45	3.86864	3.49325	1.58808	0.888395	0.757576	0.402576	0.848083
		Cleaved C3 + cell density	58.4011	58.9816	32.9065	56.8518	21.5905	38.6142	3.125	28.4952	17.8571	31.2757	21.2121		1.17765	2.83821	0.966669			1.05872	0.610772	0.530303	0.0805153	0.516224
		Average:					Average					Average			Average			Average			Average		Average
		p53 + cell density	28.8985				p53 + cell density	30.27				p53 + cell density	22.4708		p53 + cell density	1.35362		p53 + cell density	3.68094		p53 + cell density	1.07802	p53 + cell density	0.62533
		Cleaved C3 + cell density	51.7853				Cleaved C3 + cell density	38.6142				Cleaved C3 + cell density	20.393		Cleaved C3 + cell density	1.66084		Cleaved C3 + cell density			Cleaved C3 + cell density	0.733265	Cleaved C3 + cell density	0.29837
		SUMMARY RESULTS
			Haus6 cKO			Control				Haus6 cKO		Control		t.test - Control vs Haus6 cKO
		Embryo #	cKO - 1	cKO - 2	cKO - 3	Ctr - 1	Ctr - 2	Ctr - 3	Ctr - 4	Average	St Dev	Average	St Dev	P-value
	Cell density	p53 positive	28.8985	30.27	22.4708	1.35362	3.68094	1.07802	0.62533	27.2131	4.16382	1.68448	1.36442	7.75802e-05	***
		Cleaved Caspase 3 positive	51.7853	38.6142	20.393	1.66084		0.733265	0.29837	36.9308	15.7637	0.897492	0.695925	0.0167427	*

## Sheet: Fig2m
	Genotype:		Haus6 cKO
	Embryo #:		cKO - 1					cKO - 2										cKO - 3
	Section #:		cKO - 1.1	cKO - 1.2	cKO - 1.3	Total	% of total p53 + cells (Average)	cKO - 2.1	cKO - 2.2	cKO - 2.3	cKO - 2.4	cKO - 2.5	cKO - 2.6	cKO - 2.7	cKO - 2.8	Total	% of total p53 + cells (Average)	cKO - 3.1	cKO - 3.2	Total	% of total p53 + cells (Average)	Average	St Dev
	# p53 + cells co-staining with	Pax6+	40	43	46	129	0.941606	67	35	85	24	62	85	2	115	475	0.836268	140	124	264	0.838095	0.87199	0.0602964
		bIII-tub+		1	1	2	0.0145985	5		2	15	2	2	5	10	41	0.0721831	10	13	23	0.0730159	0.0532658	0.0334895
		No marker		5	1	6	0.0437956	12	5	4	3	8	3	1	12	48	0.084507	19	3	22	0.0698413	0.066048	0.0206191
		both bIII-tub and PAx6				0	0			1		1		1	1	4	0.00704225	3	3	6	0.0190476	0.00869662	0.00963097
