# Supplementary material for: Augmin deficiency in neural stem cells causes p53-dependent apoptosis and aborts brain development
Source: eLife. 2021 Aug 24;10:e67989. doi: 10.7554/eLife.67989 (PMC8456695; doi:10.7554/eLife.67989)
Supplement: Figure 3—figure supplement 1—source data 1. [file elife-67989-fig3-figsupp1-data1.xlsx]

## Sheet: Fig3-supplement 1b
CORTEX E13.5
Genotype	p53 KO Control															Genotype	p53 KO; Haus6 cKO
Animal	p53 Ctr - 1					p53 Ctr - 2					p53 Ctr - 3					Animal	double KO - 1					r8-3-27					R9-3-20					R3-4-2-21
Cut	p53 Ctr - 1.1	p53 Ctr - 1.2	p53 Ctr - 1.3	Average		p53 Ctr - 2.1	p53 Ctr - 2.2	p53 Ctr - 2.3	Average		p53 Ctr - 3.1	p53 Ctr - 3.2	p53 Ctr - 3.3	Average		Cut	double KO - 1.1	double KO - 1.2	double KO - 1.3	Average		double KO - 2.1	double KO - 2.2	double KO - 2.3	Average		double KO - 3.1	double KO - 3.2	double KO - 3.3	Average		double KO - 4.1	double KO - 4.2	double KO - 4.3	Average
Total # cells	4240	4904	4839			5752	5316	5695			2600	4117	3039			Total # cells	1299	1231	1047			2602	2860	1201			1595	2097	2266			1246	1468	3643
p21 + cells	31	35	46			104	103	91			12	20	8			p21 + cells	9	3	6			43	39	24			22	50	52			10	8	39
% cell, p21+	0.00731132	0.00713703	0.0095061	0.00798482		0.0180807	0.0193755	0.0159789	0.0178117		0.00461538	0.00485791	0.00263244	0.00403525		% cell, p21+	0.00692841	0.00243704	0.00573066	0.00503204		0.0165257	0.0136364	0.0199833	0.0167152		0.0137931	0.0238436	0.0229479	0.0201949		0.00802568	0.00544959	0.0107055	0.00806025
				0.00798482					0.0178117					0.00403525						0.00503204					0.0167152					0.0201949					0.00806025
DATA SUMMARY:
Genotype:	n	%p21 + average	% p21+ st dev	t.test (p53 KO vs Haus6 cKO; p53 KO( - P-value:
p53 KO	3	0.00994392	0.00709409
Haus6 cKO; p53 KO	4	0.0125006	0.00712883	0.657819	ns

## Sheet: Fig3-supplement 1d
THALAMUS e13.5
Genotype	p53 KO Control															Genotype	p53 KO; Haus6 cKO
Embryo #:	p53 Ctr - 1					p53 Ctr - 2					p53 Ctr - 3					Animal	double KO - 1					double KO - 2				double KO - 3
Section #:	p53 Ctr - 1.1	p53 Ctr - 1.2	p53 Ctr - 1.3	Average		p53 Ctr - 2.1	p53 Ctr - 2.2	p53 Ctr - 2.3	Average		p53 Ctr - 3.1	p53 Ctr - 3.2	p53 Ctr - 3.3	Average		Cut	double KO - 1.1	double KO - 1.2	double KO - 1.3	Average		double KO - 2.1	double KO - 2.2	Average		double KO - 3.1	double KO - 3.2	Average
Total # cells	4416	6362	8494			2025	3328	9049			15145	11745	11312			Total # cells	5403	5030	13491			2746	4922			2717	6758
p21 + cells	133	166	178			53	75	137			158	49	45			p21 + cells	54	49	141			23	54			22	68
% cell, p21+	0.0301178	0.0260924	0.020956	0.025722		0.0261728	0.0225361	0.0151398	0.0212829		0.0104325	0.00417199	0.00397808	0.00619418		% cell, p21+	0.00999445	0.00974155	0.0104514	0.0100625		0.00837582	0.0109711	0.00967348		0.00809717	0.0100621	0.00907966
Average % p21+ cell (per embryo):				0.025722					0.0212829					0.00619418						0.0100625				0.00967348				0.00907966
DATA SUMMARY:
Genotype:	n	%p21 + average	% p21+ st dev	t.test (p53 KO vs Haus6 cKO; p53 KO( - P-value:
p53 KO	3	0.017733	0.0102365
Haus6 cKO; p53 KO	3	0.0096052	0.000494951	0.241505	ns
