# Supplementary material for: Augmin deficiency in neural stem cells causes p53-dependent apoptosis and aborts brain development
Source: eLife. 2021 Aug 24;10:e67989. doi: 10.7554/eLife.67989 (PMC8456695; doi:10.7554/eLife.67989)
Supplement: Figure 3—source data 1. [file elife-67989-fig3-data1.xlsx]

## Sheet: Fig3d-thalamus
>>> E13.5 THALAMUS
	Genotype:	CONTROL																	Haus6 cKO																		p53 KO Control									Haus6 cKO; p53 KO
	Embryo:	Ctr - 1				Ctr - 2			Ctr - 3				Ctr - 4			Ctr - 5			cKO - 1					cKO - 2			cKO - 3							cKO - 4			p53 Ctr - 1			p53 Ctr - 2			p53 Ctr - 3			double KO - 1			double KO - 2
	Section #	Ctr - 1.1	Ctr - 1.2	Ctr - 1.3		Ctr - 2.1	Ctr - 2.2		Ctr - 3.1	Ctr - 3.2	Ctr - 3.3		Ctr - 4.1	Ctr - 4.2		Ctr - 5.1	Ctr - 5.2		cKO - 1.1	cKO - 1.2	cKO - 1.3	cKO - 1.4		cKO - 2.1	cKO - 2.2		cKO - 3.1	cKO - 3.2	cKO - 3.3	cKO - 3.4	cKO - 3.5			cKO - 4.1	cKO - 4.2		p53 Ctr - 1.1			p53 Ctr - 2.1	p53 Ctr - 2.2		p53 Ctr - 3.1			doubke KO - 1.1	doubke KO - 1.2		double KO - 2.1
	Area (100 um)2	3.3966	8.1037	10.3448		2.3264	4.294		7.5563	18.01	13.2		12.42	27.12		11.4246	11.4246		2.5342	2.8653	3.3428	2.1987		2.779	1.8387		2.24	2.2109	2.24	2.43	1.65			6.9878	5.5951		5.909			12.4146	13.092		30.8796			13.6995			12.0926
	# CC3 + cells	4	23	10		0	0		8	11	7		1	14		13	13		148	169	110	125		60	71		7	63	40	76	35			138	146		5			32	6		0			32			69
	CC3+ cell density	1.17765	2.83821	0.966669		0	0		1.05872	0.610772	0.530303		0.0805153	0.516224		1.1379	1.1379		58.4011	58.9816	32.9065	56.8518		21.5905	38.6142		3.125	28.4952	17.8571	31.2757	21.2121			19.7487	26.0943		0.846167			2.57761	0.458295		0			2.33585			5.70597
		Average				Average				Average			Average			Average								Average							Average			Average						Average						Average			Average
		Cleaved C3 + cell density	1.66084			Cleaved C3 + cell density	0			Cleaved C3 + cell density	0.733265		Cleaved C3 + cell density	0.29837		Cleaved C3 + cell density	1.1379		51.7853					Cleaved C3 + cell density	38.6142						Cleaved C3 + cell density	20.393		CC3 +	22.9215		0.846167			Cleaved C3 + cell density	1.51795		0			Cleaved C3 +	2.33585		Cleaved C3 +
		CONTROL																	Haus6 single cKO																		p53 KO Control									Haus6 cKO; p53 KO
SUMMARY RESULTS:
	Density CC3 + cells in the E13.5 thalamus
Embryo #:	Control	Haus6 cKO (single)	p53 KO Control	Haus6/p53 double KO
1	1.66084	51.7853	0.846167	2.33585
2	0	38.6142	1.51795	5.30637
3	0.733265	20.393	0	4.21915
4	0.29837	22.9215
5	1.1379
Average	0.766074	33.4285	0.78804	3.95379
Standar Desviation	0.660597	14.6536	0.760644	1.50293
t.test		Haus6 cKO vs Control		double KO vs p53 KO
P-value		0.00144915		0.0312219
		**		*
				double KO vs single cKO
				0.0195019
				*
				t.test control vs single
					t.test p53 ko vs double														Control					Single ko					p53 KO
		Average	st dev	***	*														1	2	3	4	5	1	2	3	4	5	1	2	3	4	5	1	2
		#REF!	#REF!	#REF!	#REF!														0	0	2.33585	0	0	51.7853	38.6142	20.393	22.9215	22.9215	0	0	0	0		0	0
[truncated: 3 more columns]

## Sheet: Fig.3d-cortex
>> E13.5 CORTEX
Genotype:	p53 KO Control															Haus6 cKO; p53 KO (double KO)
Embryo #:	p53 Ctr - 1			p53 Ctr - 2			p53 Ctr - 3				p53 Ctr - 4					double KO - 1					double KO - 2								double KO - 3			double KO - 4
Section #:	p53 Ctr - 1.1	p53 Ctr - 1.2		p53 Ctr - 2.1	p53 Ctr - 2.2		p53 Ctr - 3.1	p53 Ctr - 3.2	p53 Ctr - 3.3		p53 Ctr - 4.1	p53 Ctr - 4.2	p53 Ctr - 4.3			double KO - 1.1	double KO - 1.2	double KO - 1.3	double KO - 1.4		double KO - 2.1	double KO - 2.2	double KO - 2.3	double KO - 2.4	double KO - 2.5	double KO - 2.6	double KO - 2.7		double KO - 3.1	double KO - 3.2		double KO - 4.1	double KO - 4.2
Area um2	27733	31900		84570	91081		132747	118903	116207		102480	116515	94657			123678	97401	308796	107714		81930	96393	336831	271336	277018	102208	104742		101379	109972		128642	136925
Area (100 um2)	2.7733	3.19		8.457	9.1081		13.2747	11.8903	11.6207		10.248	11.6515	9.4657			12.3678	9.7401	30.8796	10.7714		8.193	9.6393	33.6831	27.1336	27.7018	10.2208	10.4742		10.1379	10.9972		12.8642	13.6925
# CC3 + cells	0	1		2	4		21	48	19		27	45	27			61	24	32	21		20	15	43	28	7	6	6		34	33		55	57
Density CC3 +	0	0.31348		0.23649	0.43917		1.58196	4.0369	1.63501		2.63466	3.86216	2.8524			4.93216	2.46404	1.03628	1.94961		2.44111	1.55613	1.2766	1.03193	0.252691	0.587038	0.572836		3.35375	3.00076		4.27543	4.16286
	Average	0.15674		Average	0.33783		Average	2.41796			Average	3.11641				Average	2.59552				Average	1.10262							Average	3.17726		Average	4.21915
	p53 KO Control															Haus6 cKO; p53 KO (double KO)
> DATA SUMMARY:
E13.5 Cortex	p53 KO control						Haus6 cKO; p53 KO (double KO)
Sample	p53 Ctr - 1	p53 Ctr - 2	p53 Ctr - 3	p53 Ctr - 4	Average	Stdev	double KO - 1.1	double KO - 1.2	double KO - 1.3	double KO - 1.4	Average	St dev	t.test - p53 KO Control vs p53KO;Haus6cko (double KO) - P-value:
CC3+ cell density	0.15674	0.33783	2.41796	3.11641	1.50723	1.48439	2.59552	1.10262	3.17726	4.21915	2.77364	1.30082	0.246732	ns
