# Supplementary material for: Augmin deficiency in neural stem cells causes p53-dependent apoptosis and aborts brain development
Source: eLife. 2021 Aug 24;10:e67989. doi: 10.7554/eLife.67989 (PMC8456695; doi:10.7554/eLife.67989)
Supplement: Figure 4—figure supplement 1—source data 1. [file elife-67989-fig4-figsupp1-data1.xlsx]

## Sheet: Fig4-supplement 1b,d
					Fig. 4s1b	Fig.4s1d		Fig. 4s1b	Fig.4s1d	Fig. 4s1b	Fig.4s1d	Fig. 4s1b	Fig.4s1d
		Genotype	Embryo	# mitotic cells counted	# cells with fragmented centrosomes	# cells with disorganized spindles		% cells with fragmented centrosomes	% cells with disorganized spindles	mean % cells with fragm. centrosomes	mean % cells with disorg. spindles	SD % cells with fragm. centrosomes	SD % cells with disorg. spindles
		p53 KO	p53 Ctr - 1	70	1	0		1.42857	0	1.90476	1.85714	1.50585	1.46823
			p53 Ctr - 2	75	0	2		0	2.66667
			p53 Ctr - 3	70	2	1		2.85714	1.42857
			p53 Ctr - 4	30	1	1		3.33333	3.33333
		Haus6 cKO; p53 KO	double KO - 1	64	35	33		54.6875	51.5625	53.4857	57.1248	3.84785	10.2842
			double KO - 2	129	73	89		56.5891	68.9922
			double KO - 3	61	30	31		49.1803	50.8197

## Sheet: Fig4-supplement 1f
			mitotic cells counted with # centrin foci:						% mitotic cells with # centrin foci				mean			Std Dev
	Genotype	Embryo	<3	3-4	>4		total		<3	3-4	>4		% <3	% 3-4	% >4	% <3	% 3-4	% >4
	p53 KO	p53 Ctr - 1	1	24	0		25		4	96	0		3.67323	96.3268	0	0.289609	0.289609	0
		p53 Ctr - 2	1	27	0		28		3.57143	96.4286	0
		p53 Ctr - 3	1	28	0		29		3.44828	96.5517	0
	Haus6 cKO; p53 KO	double KO - 1	3	37	22		62		4.83871	59.6774	35.4839		5.97881	61.6458	32.3754	1.51074	5.2236	4.65216
		double KO - 2	2	25	10		37		5.40541	67.5676	27.027
		double KO - 3	2	15	9		26		7.69231	57.6923	34.6154

## Sheet: Fig4-supplement 1g
	Cell areas in mm2
	Haus6 cKO; p53 KO
	Embryo #1		Embryo #1		Embryo #3
	4 centrioles	>4 centrioles	4 centrioles	>4 centrioles	4 centrioles	>4 centrioles		mean all embryos:	4 centrioles	>4 centrioles
	103.328	98.328	73.117	338.578	66.221	131.497			75.1876	149.824
	67.911	113.309	56.638	120.513	62.487	101.979		SD all embryos:	6.63662	12.2855
	64.82	125.243	85.649	87.062	68.644	102.242
	57.101	76.94	66.266	102.956	46.587	97.744
	49.923	124.472	118.977	133.174	67.165	140.391
	70.025	126.651	85.436	123.418	57.956	98.611
	56.324	129.485	80.539	139.35	65.899	169.645
	58.708	225.75	53.072	182.904	79.646	158.489
	54.968	184.536	91.69	119.53	66.825	114.003
	67.57	100.372	85.751	116.992	65.874	88.328
	82.043	128.116	91.343	114.729	70.931	85.533
	82.969	167.582	80.186	168.161	60.398	128.579
	79.376	181.702	120.68	190.487	83.329	176.008
	117.358	318.7	103.534	111.773	79.575	117.461
	107.531	287.042	59.1	113.02	62.018	214.844
	53.785	88.939	66.741		82.827	172.846
	90.501	102.371			61.047	123.617
	65.16	163.771			57.635	167.634
	63.824	127.294			91.375	187.068
	76.69	196.085			91.105	171.741
	76.606	139.061				220.667
	55.578	365.923
	70.906	139.639
	85.732	222.711
	77.956
	81.214
	mean	mean	mean	mean	mean	mean
	73.7657	163.918	82.4199	144.176	69.3772	141.377
