# Supplementary material for: Augmin deficiency in neural stem cells causes p53-dependent apoptosis and aborts brain development
Source: eLife. 2021 Aug 24;10:e67989. doi: 10.7554/eLife.67989 (PMC8456695; doi:10.7554/eLife.67989)
Supplement: Figure 4—source data 1. [file elife-67989-fig4-data1.xlsx]

## Sheet: Fig4c
E13.5 - Cortex
>> RAW DATA - DATA SUMMARY AND ANALYSIS AT THE BOTTOM:
	Genotype:	p53 KO			p53 KO			p53 KO			Haus6 cKO; p53 KO (double KO)
		cortex			cortex			cortex			cortex			cortex
	0	p53 Ctr - 1			p53 Ctr - 2			p53 Ctr - 3			double KO - 1			double KO - 2
	Section #:	p53 Ctr - 1.1	p53 Ctr - 1.2		p53 Ctr - 2.1	p53 Ctr - 2.2		p53 Ctr - 3.1	p53 Ctr - 3.2		double KO - 1.1	double KO - 1.2		double KO - 2.1	double KO - 2.2
	Column width analysed:	307	547		585	538		355	181		515	419		205	216
	Distance to VZ for each cell analysed:	11	7		7	6		127	10		15	15		15	8
		12	9		13	4		7	6		9	16		7	6
		6	6		9	6		8	6		4	23		54	7
		4	8		6	16		7	4		73	7		64	28
		8	7		9	19		10	4		38	17		80	26
		2	6		5	6		8	121		7	9		32	40
		8	7		124	7		10	5		10	12		25	39
		8	6		9	6		12	8		23	21		16	45
		5	7		7	4		7	6		31	12		11	19
		8	145		8	10		13	10		70	14		14	25
		5	7		5	9		9	8		93	8		32	8
		5	11		6	17		6	4		107	7		39	5
		7	9		5	6		112	229		119	11		51	15
		5	10		8	4		114			167	8		26	10
		7	7		9	6		103			254	17		24	6
		100	6		7	6		121			220	11		13	6
		9	8		7	4		9			228	8		36	20
		7	103		30	5		6			212	5		32	33
		45	114		54	4		7			204	13		11	52
		5	8		38	5		10			104	8		63	36
		96	4		6	4		12			154	12		37	64
			11		7	5		7			173	8		62	71
			6		7	6		9			87	21		62	86
			10		7	4		8			96	7		40	92
			7		10	6		10			77	10		40	66
			6		3	7		7			19	97		68	61
			8		8	5		8			12	116		86	57
			6		5	5		58			14	121		91	61
			7		5	6		111			12	98		78	76
			10		6	6		202			38	110		116	72
			9		4	6					60	138		104	76
			7		3	9					95	155		91	88
			6		3	5					107	191		98	86
			6		5	5					138	207		123	94
			6		5	6					132	227		111	63
			7		3	5					158	217		139	73
			10		4	8					172	212		120	116
			110		5	6					162	228		130	196
			5		4	5					10	220		126	228
			6		3	5					8	218		151	215
			10		9	5					9	99		147	171
			7		5	5					9	144		141	193
					8	5					15	175		163	174
					5	5					9	50		150	208
					6	118					12	47		169	182
					5	30					6	58		210	167
					5	37					4	76		267	145
					3	111					7	126		293	141
					3	85					11	97		284	137
					4	123					6	104		229	113
					5	122					6	146		267	135
					4	125					29	184		108	93
					5	100					44	196		101	115
					6	100					62	235		119	120
					5	93					41	257		168	98
					3	108					68	211		74	136
					7	112					111	75		155	131
					5	187					142	72		167	146
					80	123					182	110		180	173
					121	122					55	123		196	179
					26						100	190		198	198
					101						131	190		187	143
					108						40	204		186	160
					125						59	200		234	182
					119						53	114		215	204
					128						58	89		271	227
					146						85	103		254	263
					116						81	125		258	241
											98	162		249	249
											176	181		233	216
											208	236		258	259
											218	225		267	151
											71	260		296	161
											42	95		187	196
											75	60		187	187
											101	40		199	199
											115	45		197	203
											133	96		106	217
											176	74		116	215
											123	100		180	223
											140	87		211	232
											107	117		212	229
											31	151		224	242
											53	168		238	238
											86	163		233	257
											115	185		253	239
											203	211			228
											125	243
											64	235
											101	109
											144	114
											154	98
											165	113
											200	125
											5	142
											10	101
											10	109
											8	129
											8	192
											93	206
											15	216
											112	228
											144	32
											152	47
											168	70
											153	103
											148	116
											175	55
											155	71
											159	68
											121	24
											5	25
											13	12
											7	24
											12	13
											8	99
											17	101
											12	122
											29	135
											11	140
											6	154
											9	124
											25	282
											46	198
											53	183
											66	194
											9	207
											26	220
											136	190
											172	141
											206	122
											184	150
											213	154
											205	161
											105	173
											77	193
											100	191
											116	133
											156	159
											169	178
											180	216
											214	230
											193	144
											212	105
											198	59
											159	173
											205	186
											232	219
											218	222
											242	227
											168	251
											161	19
											176	40
												76
												90
												144
												152
												209
												225
	Genotype:	p53 KO									Haus6 cKO; p53 KO (double KO)
	Embryo #	p53 Ctr - 1			p53 Ctr - 2			p53 Ctr - 3			double KO # 1			double KO # 2
	Section:	p53 Ctr - 1.1	p53 Ctr - 1.2	Average	p53 Ctr - 2.1	p53 Ctr - 2.2	Average	p53 Ctr - 3.1	p53 Ctr - 3.2	Average	double KO - 1.1	double KO - 1.2	Average	double KO - 2.1	double KO - 2.2	Average
Total # mitosis		21	42		68	60		30	13		153	159		86	87
# mitosis / 100 um column:
	0-30	5.86319	6.94698	6.40509	9.40171	8.17844	8.79007	6.19718	6.07735	6.13727	8.54369	7.39857	7.97113	4.87805	6.48148	5.67977
	30-60	0.325733	0	0.162866	0.512821	0.371747	0.442284	0.28169	0	0.140845	2.91262	2.38663	2.64963	4.87805	3.24074	4.05939
	60.90	0	0	0	0.17094	0.185874	0.178407	0	0	0	2.91262	2.6253	2.76896	4.39024	6.01852	5.20438
	90-120	0.651466	0.548446	0.599956	0.683761	1.30112	0.992438	1.12676	0	0.56338	3.8835	6.20525	5.04437	5.36585	3.24074	4.3033
	120-150	0	0.182815	0.0914077	0.854701	0.929368	0.892034	0.56338	0.552486	0.557933	2.52427	4.53461	3.52944	3.41463	4.16667	3.79065
	150-180	0	0	0	0	0	0	0	0	0	4.46602	3.57995	4.02299	3.41463	3.7037	3.55917
	180-210	0	0	0	0	0.185874	0.0929368	0.28169	0	0.140845	2.3301	5.01193	3.67102	4.87805	5.09259	4.98532
	210-240	0	0	0	0	0	0	0	0.552486	0.276243	1.74757	5.01193	3.37975	4.87805	5.55556	5.2168
	240-270	0	0	0	0	0	0	0	0	0	0.38835	0.954654	0.671502	3.90244	2.77778	3.34011
	270-300	0	0	0	0	0	0	0	0	0	0	0.238663	0.119332	1.95122	0	0.97561
>> DATA SUMMARY:
		individual embryos					Average per genotype:		Standard Desviation
		p53 KO			double KO		p53 KO	double KO	p53 KO	double KO	t.test p53 vs double KO
	Embryo #:	p53 Ctr - 1	p53 Ctr - 2	p53 Ctr - 3	double KO - 1	double KO - 2
# mitosis / 100 um column:
	Distance from VZ:
	0-30	6.40509	8.79007	6.13727	7.97113	5.67977	7.11081	6.82545	1.46044	1.62024	0.849795	ns
	30-60	0.162866	0.442284	0.140845	2.64963	4.05939	0.248665	3.35451	0.16804	0.996856	0.0104475	*
	60.90	0	0.178407	0	2.76896	5.20438	0.059469	3.98667	0.103003	1.7221	0.0229764	*
	90-120	0.599956	0.992438	0.56338	5.04437	4.3033	0.718591	4.67384	0.237862	0.52402	0.00122933	**
	120-150	0.0914077	0.892034	0.557933	3.52944	3.79065	0.513792	3.66004	0.402134	0.184704	0.00213873	**
	150-180	0	0	0	4.02299	3.55917	0	3.79108	0	0.327968	0.000207483	***
	180-210	0	0.0929368	0.140845	3.67102	4.98532	0.0779273	4.32817	0.0716121	0.929354	0.00327634	**
	210-240	0	0	0.276243	3.37975	5.2168	0.092081	4.29828	0.159489	1.29899	0.00904505	**
	240-270	0	0	0	0.671502	3.34011	0	2.00581	0	1.88699	0.137075	ns
	270-300	0	0	0	0.119332	0.97561	0	0.547471	0	0.60548	0.184745	ns

## Sheet: Fig4d
	Genotype:	Haus6 cKO; p53 KO (double KO)						p53 KO Control
	Embryo #	double KO - 1			double KO - 2			p53 Ctr - 1			p53 Ctr - 2			p53 Ctr - 3
		# phases	% phases		# phases	% phases		# phases	% phases		# phases	% phases		# phases	% phases
	Prophase	11	0.0564103		15	0.0604839		17	0.121429		28	0.17284		22	0.157143
	Prometaphase	107	0.548718		151	0.608871		50	0.357143		56	0.345679		48	0.342857
	Metaphase	46	0.235897		51	0.205645		40	0.285714		33	0.203704		27	0.192857
	Anaphase	9	0.0461538		5	0.0201613		15	0.107143		22	0.135802		16	0.114286
	Telophase	8	0.0410256		11	0.0443548		10	0.0714286		12	0.0740741		16	0.114286
	Ana/Telophase	17	0.0871795		16	0.0645161		25	0.178571		34	0.209877		32	0.228571
	Monopolar	14	0.0717949		15	0.0604839		8	0.0571429		11	0.0679012		11	0.0785714
	Total mitosis	195			248			140			162			140
							Average		St Dev
	Genotype:	Haus6 cKO; p53 KO (double KO)		p53 KO Ctr			p53 KO	Haus6 cKO	p53 KO	Haus6 cKO	t-test - p53 KO vs double KO
	Embryo:	double KO - 1	double KO - 2	p53 Ctr - 1	p53 Ctr - 2	p53 Ctr - 3					P-value:
	Prophase	0.0564103	0.0604839	0.121429	0.17284	0.157143	0.15047	0.0584471	0.026347	0.00288048	0.0185175	*
	Prometaphase	0.548718	0.608871	0.357143	0.345679	0.342857	0.34856	0.578794	0.00756598	0.0425346	0.00215359	**
	Metaphase	0.235897	0.205645	0.285714	0.203704	0.192857	0.227425	0.220771	0.0507705	0.0213916	0.876903
	Ana/Telophase	0.0871795	0.0645161	0.178571	0.209877	0.228571	0.205673	0.0758478	0.0252636	0.0160254	0.00811379	**
	Monopolar	0.0717949	0.0604839	0.0571429	0.0679012	0.0785714	0.0678718	0.0661394	0.0107143	0.00799809	0.86011

## Sheet: Fig4f
	Genotype:	Haus6 cKO; p53 KO (double KO)			p53 KO Control
	Embryo #	double KO - 1	double KO - 2		p53 Ctr - 1	p53 Ctr - 2	p53 Ctr - 3
		# cells	# cells		# cells	# cells	# cells
	Total # Metaphases:	46	51		40	33	27
	Multipolar metaphases:	11	20		0	0	0
	% Multipolar metaphases:	0.23913	0.392157		0	0	0
	SUMMARY RESULTS:
		% Multipolar metaphases
		Average	StDev	t.test (p53 KO Control vs double KO):
	p53 KO Control	0	0	P-value
	Haus6 cKO; p53 KO (double KO)	0.315644	0.108206	0.0116241	*

## Sheet: Fig4g
	Genotype:	Haus6 cKO; p53 KO (double KO)			p53 KO Control
	Embryo #	double KO - 1	double KO - 2		p53 Ctr - 1	p53 Ctr - 2	p53 Ctr - 3
		# cells	# cells		# cells	# cells	# cells
	Total # Anaphases + Telophases:	17	16		25	34	32
	Abnormal Ana and telophases:	10	9		0	1	0
	% abnormal ana/telophases:	0.588235	0.5625		0	0.0294118	0
	SUMMARY RESULTS:
		% abnormal ana/telophases:
		Average	StDev	t.test (p53 KO Control vs double KO):
	p53 KO Control	0.00980392	0.0169809	P-value
	Haus6 cKO; p53 KO (double KO)	0.575368	0.0181976	4.86816e-05	***

## Sheet: Fig4h
	>> RAW cell counts - DATA SUMMARY on the RIGHT																							>> Detailed % of cells per category per sample - SUMMARY RESULTS ON THE RIGHT																							> DATA SUMMARY:
				p53 KO Control										Haus6 / p53 double KO												p53 KO Control										Haus6 / p53 double KO
		Embryo #:		p53 Ctr - 1		p53 Ctr - 2		p53 Ctr - 3	p53 Ctr - 4			p53 Ctr - 5		CX208_06_15			CX205_05_7	r3-4-16		r3-6_9						p53 Ctr - 1		p53 Ctr - 2		p53 Ctr - 3	p53 Ctr - 4			p53 Ctr - 5		CX208_06_15			CX205_05_7	r3-4-16		r3-6_9
		Section #:		p53 Ctr - 1.1	p53 Ctr - 1.2	p53 Ctr - 2.1	p53 Ctr - 2.2	p53 KO Ctr - 3.1	p53 Ctr - 4.1	p53 Ctr - 4.2	p53 Ctr - 4.3	p53 Ctr - 5.1	p53 Ctr - 5.2	3rd cut #1	3rd cut#2	2nd cut		1st cut	3rd cut	1st cut	2nd cut	3rd cut				p53 Ctr - 1.1	p53 Ctr - 1.2	p53 Ctr - 2.1	p53 Ctr - 2.2	p53 KO Ctr - 3.1	p53 Ctr - 4.1	p53 Ctr - 4.2	p53 Ctr - 4.3	p53 Ctr - 5.1	p53 Ctr - 5.2	3rd cut #1	3rd cut#2	2nd cut		1st cut	3rd cut	1st cut	2nd cut	3rd cut				p53 KO Control:
		nucleus size (um2)																																													Embryo #:	p53 Ctr - 1	p53 Ctr - 2
		from:	to:	515	444	713	567	330	329	239	166	386	240	883	712	417	999	532	462	390	472	373		Cell distribution according to nuclei size (as %)	Nucleus size:																					Cell distribution according to nuclei size (as %)	Nucleus size:
	TOTAL COUNTS (# cells counted)	10	20	184	188	272	221	147	127	33	27	117	50	273	254	116	343	153	88	86	97	53			20	0.357282	0.423423	0.381487	0.389771	0.445455	0.386018	0.138075	0.162651	0.303109	0.208333	0.309173	0.356742	0.278177	0.343343	0.287594	0.190476	0.220513	0.205508	0.142091			20	0.390352	0.385629
		20	40	239	203	360	254	158	154	135	102	212	135	324	239	171	364	196	199	166	214	156			40	0.464078	0.457207	0.504909	0.447972	0.478788	0.468085	0.564854	0.614458	0.549223	0.5625	0.366931	0.335674	0.410072	0.364364	0.368421	0.430736	0.425641	0.45339	0.418231			40	0.460642	0.47644
		40	60	80	44	72	83	23	40	56	33	56	49	151	118	64	164	103	115	95	110	105			60	0.15534	0.0990991	0.100982	0.146384	0.069697	0.121581	0.23431	0.198795	0.145078	0.204167	0.171008	0.16573	0.153477	0.164164	0.193609	0.248918	0.24359	0.233051	0.281501			60	0.127219	0.123683
		60	80	12	8	9	8	2	8	14	4	1	6	67	44	34	76	47	36	22	38	40			80	0.023301	0.018018	0.0126227	0.0141093	0.00606061	0.0243161	0.0585774	0.0240964	0.00259067	0.025	0.0758777	0.0617978	0.0815348	0.0760761	0.0883459	0.0779221	0.0564103	0.0805085	0.107239			80	0.0206595	0.013366
		80	100	0	1	0	1	0	0	1	0	0	0	38	40	19	24	16	16	14	9	12			100	0	0.00225225	0	0.00176367	0	0	0.0041841	0	0	0	0.0430351	0.0561798	0.0455635	0.024024	0.0300752	0.034632	0.0358974	0.0190678	0.0321716			100	0.00112613	0.000881834
		100	120	0	0	0	0	0	0	0	0	0	0	18	11	4	14	8	6	6	4	5			120	0	0	0	0	0	0	0	0	0	0	0.0203851	0.0154494	0.00959233	0.014014	0.0150376	0.012987	0.0153846	0.00847458	0.0134048			120	0	0
		120	140	0	0	0	0	0	0	0	0	0	0	9	6	3	10	7	2	1	0	1			140	0	0	0	0	0	0	0	0	0	0	0.0101925	0.00842697	0.00719424	0.01001	0.0131579	0.004329	0.0025641	0	0.00268097			140	0	0
		140	160	0	0	0	0	0	0	0	0	0	0	2	0	2	3	1	0	0	0	1			160	0	0	0	0	0	0	0	0	0	0	0.00226501	0	0.00479616	0.003003	0.0018797	0	0	0	0.00268097			160	0	0
		160	180	0	0	0	0	0	0	0	0	0	0	1	0	3	1	1	0	0	0	0			180	0	0	0	0	0	0	0	0	0	0	0.0011325	0	0.00719424	0.001001	0.0018797	0	0	0	0			180	0	0
		180	200	0	0	0	0	0	0	0	0	0	0	0	0	1	0	0	0	0	0	0			200	0	0	0	0	0	0	0	0	0	0	0	0	0.00239808	0	0	0	0	0	0			200	0	0
				p53 KO Control										Haus6 / p53 double KO												p53 KO Control										Haus6 / p53 double KO
[truncated: 14 more columns]

## Sheet: Fig4 i&j
> Thalamus E13.5
		Haus6 cKO (single)						Haus6 cKO; p53 KO (double KO)
	Embryo:	cKO - 1	cKO - 2	cKO - 3	cKO - 4	Average	St dev	double KO - 1	double KO - 2	double KO - 3	Average	St Dev	t.test (single cKO vs double KO)
	# of mitotic cells counted	213	221	316	195			260	213	145			P-value:
	# metaphasic cells	45	32	40	39			81	48	32
	# multipolar metaphases	4	4	4	5			30	16	11
Data for Figure 4i >>	% multipolar metaphases	0.0888889	0.125	0.1	0.128205	0.110524	0.0191573	0.37037	0.333333	0.34375	0.349151	0.0191001	1.57137e-05	***
	# ana+telophases	19	28	39	17			33	33	24
	# abnormal ana+telophases	6	9	18	8			23	21	11
Data for Figure 4j >>	% abnormal ana+telophases	0.315789	0.321429	0.461538	0.470588	0.392336	0.085244	0.69697	0.636364	0.458333	0.597222	0.12404	0.0473165	*
