# Supplementary material for: Augmin deficiency in neural stem cells causes p53-dependent apoptosis and aborts brain development
Source: eLife. 2021 Aug 24;10:e67989. doi: 10.7554/eLife.67989 (PMC8456695; doi:10.7554/eLife.67989)
Supplement: Figure 5—source data 1. [file elife-67989-fig5-data1.xlsx]

## Sheet: Fig5a
>> e13.5 CORTEX
	Genotype:	p53 KO control												Haus6 cKO; p53 KO (double KO)
	Embryo #	p53 Ctr - 1			p53 Ctr - 2			p53 Ctr - 3			p53 Ctr - 4			double KO - 1			double KO - 2			double KO - 3			double KO - 4
	Section	p53 Ctr - 1.1	p53 Ctr - 1.2		p53 Ctr - 2.1	p53 Ctr - 2.2		p53 Ctr - 3.1	p53 Ctr - 3.2		p53 Ctr - 4.1	p53 Ctr - 4.2		double KO - 1.1	double KO - 1.2		double KO - 2.1	double KO - 2.2		double KO - 3.1	double KO - 3.2		double KO - 4.1
	Area	130230	153270		121902	103064		50464	125926					270356	242117		174178	296270
	Total Numer of cells	1361	1470		1413	1134		432	1135		933	2000		2310	2262		1508	2610		2264	2110		1442
	# gH2AX + cells	6	21		31	42		37	29		11	58		235	532		277	315		350	285		199
	Density gH2AX + cells	0.460723	1.37013		2.54303	4.07514		7.33196	2.30294					8.69224	21.9728		15.9033	10.6322
	% gH2AX+ cells	0.00440852	0.0142857		0.0219391	0.037037		0.0856481	0.0255507		0.0117899	0.029		0.101732	0.23519		0.183687	0.12069		0.154594	0.135071		0.138003
	Average % gH2AX (per embryo)	0.00934712			0.0294881			0.0555994			0.020395			0.168461			0.152188			0.144832			0.138003
	>> DATA SUMMARY
	Genotype:	p53 KO	Haus6 cKO; p53 KO
	% gH2AX positive cells:
	Average:	0.0287074	0.150871
	St Dev:	0.0197291	0.0130792
	t.test (p53 KO CTr vs double KO)
	P value	4.83317e-05
		***

## Sheet: Fig5d
>> e13.5 THALAMUS
		Control									Haus6 cKO (single)												p53 KO Control												Haus6 cKO p53 KO
	Embryo #:	Ctr - 1			Ctr - 2			Ctr - 3			AH112_02_21			CX.BrDU_02_KO_11			CX.BrDU_03_KO_18			R2-1-12			CX.FNP202_03_27			CX.FNP202_07_17			CX208_07_15			CX_R3-2-25			CX.FNP205_05_			r3-6-11			r3-4-18
	Section #:	Ctr - 1.1	Ctr - 1.2		Ctr - 2.1	Ctr - 2.2		Ctr - 3.1	Ctr - 3.2		1	2		1	2		1	2		1	2		1	2		1	2		1	2		1	2		1	2		1	2		1	2
	Area	67486	95366		58855	67562		298065	241710		36506	24338		49870	86612		33745	32357					229283	363133		95746	178171		114365	155199					327209	403463
	Total Numer of cells	900	1448		747	851		3825	3002		407	289		619	966		377	291		2008	476		2755	4011		1084	2192		1343	1944		3698	6357		3704	4602		1021	3921		4997	2357
	# gH2AX + cells	7	8		9	2		15	14		17	22		14	46		14	20		82	32		12	10		9	24		31	47		24	109		392	497		72	460		269	192
	Density gH2AX + cells	1.03725	0.838873		1.52918	0.296024		0.503246	0.579206		4.65677	9.03936		2.8073	5.31104		4.14876	6.18104					0.523371	0.275381		0.939987	1.34702		2.71062	3.02837					11.9801	12.3184
	% gH2AX+ cells	0.00777778	0.00552486		0.0120482	0.00235018		0.00392157	0.00466356		0.041769	0.0761246		0.0226171	0.047619		0.0371353	0.0687285		0.0408367	0.0672269		0.00435572	0.00249314		0.00830258	0.0109489		0.0230827	0.024177		0.00648999	0.0171465		0.105832	0.107997		0.0705191	0.117317		0.0538323	0.0814595
			0.00665132			0.00719918			0.00429256		0.0589468			0.0351181			0.0529319			0.0540318			0.00342443			0.00962574			0.0236298			0.0118182			0.106914			0.0939181			0.0676459
	>> DATA SUMMARY:
	E13.5 THALAMUS
	Genotype:	Control	Haus 6 cKO	p53 KO	Haus6 cKO; p53 KO
	% gH2AX positive cells:
	Average:	0.00604769	0.0502571	0.0121246	0.0894927
	St Dev:	0.00154447	0.010426	0.00845381	0.0200046
	t.test		p-value
	Control vs	Haus6 KO	0.000850115	***
	Control vs	p53 KO	0.28327	ns
	p53 KO vs	double KO	0.000852879	***
	Haus6 KO vs	double KO	0.018787	*
