# Supplementary material for: Augmin deficiency in neural stem cells causes p53-dependent apoptosis and aborts brain development
Source: eLife. 2021 Aug 24;10:e67989. doi: 10.7554/eLife.67989 (PMC8456695; doi:10.7554/eLife.67989)
Supplement: Figure 6—source data 1. [file elife-67989-fig6-data1.xlsx]

## Sheet: Fig6d
		CORTEX
			p53 KO Control				p53 KO; Haus6 cKO				t.test (p53 KO vs Haus6 cKO; p53 KO)
			p53 Ctr - 1	p53 Ctr - 2	p53 Ctr - 3	p53 Ctr - 4	doubke KO - 1	doubke KO - 2	doubke KO - 3	doubke KO - 4	2-tailed unpaired t-test; assuming similar variances
	Cell Cycle Exit	(# Ki67- and BrDU+ cells )/(total # BrDU+ cells):	0.102	0.184426	0.232979	0.163854	0.0836	0.160296	0.117932	0.1285
		Average:	0.170815				0.122582				0.175435	ns
		St Dev:	0.0542637				0.0316151
		# cells counted	2119	3124	5396	4631	3401	4260	3315	3614
		# BrDU+ cells counted	1533	1679	2942	2576	1994	1812	1381	2174
		# sections counted	3	1	3	3	3	3	3	2
		(# beta3tub + and Pax6- and BrDU+ cells)/(total # BrDU+ cells)	0.3572	0.277704	0.306287	0.362133	0.163313	0.246501		0.187679	0.0104734	*
		Average	0.325831				0.151991
		St Dev	0.040825				0.1006
		# cells counted	3973	6659	4962	3879	7956	4108		4406
		# BRDU+ cells counted	2700	4614	3306	2574	3985	1750		2404
		# sections counted	3	6	3	3	6	3		3

## Sheet: Fig 6e
		E13.5 THALAMUS
			Control			Haus6 cKO			p53 KO Control				p53 KO; Haus6 cKO				teste.t
			Ctr - 1	Ctr - 2	Ctr - 3	cKO - 1	cKO - 2	cKO - 3	p53 Ctr - 1	p53 Ctr - 2	p53 Ctr - 3	p53 Ctr - 4	double KO - 1	double KO - 2	double KO - 3	double KO - 4					P-value
																	cell cycle exit	p53 KO	vs	double KO	0.00602231	**
	Cell Cycle Exit	(Ki67- and BrDU+)/(total BrDU):	0.4522	0.371138	0.139574	0.3963	0.229606	0.382	0.3562	0.477727	0.359991	0.3114	0.2186	0.104837	0.194791	0.231		Control	vs	Haus6 cKO	0.896064	ns
		Average:	0.320971			0.335969			0.37633				0.187307
		St Dev:	0.162239			0.0923896			0.0711087				0.0569962
		# BrDU+ cells counted	3195	3331	2524	1376	1679	2868	4106	2400	3152	3005	3112	1159	1341	2998
		# sections counted	3	3	3	3	3	3	3	3	3	3	3	2	2	3
	Neurogenesis	(beta3tub + and Pax6- and BrDU+)/(total BrDU)	0.365	0.473048	0.380681	0.153	0.139888	0.148	0.435	0.564608	0.524254	0.575	0.259483		0.218373	0.263
		Average	0.406243			0.146963			0.524715				0.246952								P-value
		St Dev	0.0583836			0.00661752			0.0636894				0.0248125				Neurogenesis	Control	vs	Haus6 cKO	0.00157426	**
		# BRDU+ cells counted	5087	3331	3331	1494	1974	1833	1529	1548	1657	4189	3014		1363	4903		p53 KO	vs	double KO	0.000901852	***
		# sections counted	3	3	3	2	3	3	2	3	3	3	5		2	3		Haus6 cKO	vs	doule KO	0.00251962	**
