# Supplementary material for: Augmin deficiency in neural stem cells causes p53-dependent apoptosis and aborts brain development
Source: eLife. 2021 Aug 24;10:e67989. doi: 10.7554/eLife.67989 (PMC8456695; doi:10.7554/eLife.67989)
Supplement: Figure 7—source data 1. [file elife-67989-fig7-data1.xlsx]

## Sheet: Fig 7d
			% of total PAX 6 INTENSITY:
			p53 KO Control							Haus6 cKO p53 KO (double KO)					St Dev
	distance from VZ (um):	Embryo #:	p53 Ctr - 1	p53 Ctr - 2	p53 Ctr - 3	p53 Ctr - 4	p53 Ctr - 5	Average	st dev	double KO - 1	double KO - 2	double KO - 3	double KO - 4	Average
	from:	to:
	0	9.848	5.6	4.4	5.4	5.6	4.7	5.14	0.554977	3.9	4.4	5.3	2.9	4.125	1.00125
	9.848	20.076	5.9	5.1	5.5	6.2	6.5	5.84	0.554977	4.4	5.2	5.5	3	4.525	1.11766
	20.076	30.303	6	5.9	5.5	6	6.2	5.92	0.258844	3.7	4.8	5.5	3.3	4.325	1.00789
	30.303	40.53	5.9	5.9	5	5.9	6.1	5.76	0.43359	4.1	5	6	3	4.525	1.279
	40.53	50.758	5.6	5.7	4.8	5.7	5.8	5.52	0.408656	3.8	4.7	5.5	3.4	4.35	0.939858
	50.758	60.985	5.6	5.6	4.5	6	5.5	5.44	0.559464	4.5	4.8	5.4	3.4	4.525	0.838153
	60.985	71.212	5.9	5.8	4.5	5.9	5.2	5.46	0.610737	4.2	4.7	4.9	3.3	4.275	0.713559
	71.212	81.439	5.8	5.5	5.3	5.7	5.9	5.64	0.240832	4.1	4.3	4.8	3.3	4.125	0.623832
	81.439	91.667	5.5	5.7	5.4	5.9	5.7	5.64	0.194936	3	3.8	4.7	3.2	3.675	0.763217
	91.667	101.894	5.5	5.2	5.5	6.3	5.3	5.56	0.43359	4.4	3.2	4.7	3.5	3.95	0.714143
	101.894	112.121	4.9	4.3	5.3	6.2	4.6	5.06	0.736885	3.7	2.8	4.5	3.3	3.575	0.718215
	112.121	122.348	4.3	3.1	5.2	5.1	3.5	4.24	0.937017	3.5	2.9	4.4	3.6	3.6	0.616441
	122.348	132.576	3.6	2.7	4.4	4.1	3.2	3.6	0.681909	3.1	3	4.3	3.5	3.475	0.590903
	132.576	142.803	3	2.5	3.4	3.5	3	3.08	0.396232	2.8	2.9	4.3	3.3	3.325	0.684957
	142.803	153.03	2.5	2.3	3.2	3.1	3	2.82	0.396232	3.1	2.9	4.5	3.3	3.45	0.718795
	153.03	163.258	2.3	2.4	3.2	2.8	2.9	2.72	0.370135	3.9	2.9	4.5	3.2	3.625	0.718215
	163.258	173.485	2.1	2.1	2.8	2.6	2.8	2.48	0.356371	4	3.5	4.1	3.1	3.675	0.464579
	173.485	183.712	2.1	1.9	2.7	2.4	2.9	2.4	0.412311	3.5	3.3	3.6	3.3	3.425	0.15
	183.712	193.939	1.9	1.7	2.6	2.2	3	2.28	0.526308	3.4	3.8	3.5	3.5	3.55	0.173205
	193.939	204.167	1.8	1.6	2.8	2.2	2.5	2.18	0.491935	3.7	3.2	3.5	3.4	3.45	0.208167
	204.167	214.394	1.7	1.8	2.4	2.1	2.8	2.16	0.450555	3.2	3.4	3.2	2.7	3.125	0.298608
	214.394	224.621	1.5	1.6	2.5	1.8	3	2.08	0.645755	3.2	3.1	3.3	3.1	3.175	0.0957427
	224.621	234.848	1.4	1.6	2.4	1.4	2.9	1.94	0.676757	3	3.4	3.2	3.4	3.25	0.191485
	234.848	245.076	1.5	1.6	2.3	1.3	2.5	1.84	0.527257	2.5	3.4	2.7	3.3	2.975	0.442531
	245.076	255.303	1.6	1.6	2.1	0	2.1	1.48	0.864292	2.2	3.4	2.1	3.2	2.725	0.670199
	255.303	265.53	1.5	1.5	1.4	0	2	1.28	0.752994	2.2	2.6	1.7	3.4	2.475	0.718215

## Sheet: Fig 7e
	distance from VZ (um):	Embryo #:	p53 KO Control				Haus6 cKO p53KO (double)
	from:	to:	CX202-03_16	CX207-5	Average	St Dev	CX208-05	CX205-05	Average	St Dev
	0	9.848	0.0255311	0.00823556	0.0168833	0.00864775	0.0228315	0.00762291	0.0152272	0.0107541
	9.848	20.076	0.0279474	0.024389	0.0261682	0.00177923	0.0240226	0.0317924	0.0279075	0.00549407
	20.076	30.303	0.0314273	0.0264512	0.0289393	0.00248802	0.0250454	0.0293082	0.0271768	0.00301429
	30.303	50.758	0.0370614	0.0292266	0.033144	0.00391741	0.0316609	0.0338167	0.0327388	0.00152437
	50.758	60.985	0.0415831	0.0340623	0.0378227	0.00376038	0.0393687	0.032587	0.0359779	0.00479533
	60.985	71.212	0.0401076	0.0326593	0.0363835	0.00372411	0.0364291	0.0299079	0.0331685	0.00461118
	71.212	81.439	0.0406072	0.035319	0.0379631	0.00264411	0.0323539	0.0324601	0.032407	7.50811e-05
	81.439	91.667	0.0398302	0.0359418	0.037886	0.00194423	0.0354494	0.0311052	0.0332773	0.00307184
	91.667	101.894	0.0482388	0.0367479	0.0424934	0.00574545	0.032819	0.0341552	0.0334871	0.000944866
	101.894	112.121	0.0620434	0.0314978	0.0467706	0.0152728	0.0336586	0.0309876	0.0323231	0.00188872
	112.121	122.348	0.0662172	0.0322897	0.0492535	0.0169637	0.0316314	0.0294421	0.0305368	0.00154802
	122.348	132.576	0.0587824	0.038539	0.0486607	0.0101217	0.0357498	0.0283157	0.0320327	0.0052567
	132.576	142.803	0.0512149	0.0436644	0.0474396	0.00377526	0.0358888	0.0324661	0.0341775	0.0024202
	142.803	153.03	0.0443055	0.0448479	0.0445767	0.000271215	0.032539	0.0402322	0.0363856	0.00543993
	153.03	163.258	0.0385029	0.0418221	0.0401625	0.00165963	0.0296911	0.039257	0.034474	0.00676414
	163.258	173.485	0.0376043	0.0445816	0.041093	0.00348866	0.0269591	0.0370285	0.0319938	0.00712013
	173.485	183.712	0.0359681	0.0413082	0.0386381	0.00267004	0.0306267	0.0351362	0.0328815	0.00318867
	183.712	193.939	0.0339573	0.0391168	0.036537	0.00257978	0.0280572	0.0350941	0.0315756	0.00497585
	193.939	204.167	0.03154	0.0354859	0.033513	0.00197295	0.0351211	0.0389688	0.037045	0.00272072
	204.167	214.394	0.0284123	0.0332957	0.030854	0.00244167	0.0352278	0.0319172	0.0335725	0.00234095
	214.394	224.621	0.0260906	0.0305559	0.0283233	0.00223264	0.0355408	0.030134	0.0328374	0.00382324
	224.621	234.848	0.0255362	0.0302012	0.0278687	0.0023325	0.0344713	0.0322784	0.0333749	0.00155066
	234.848	245.076	0.0242702	0.029602	0.0269361	0.00266589	0.0301609	0.0351297	0.0326453	0.00351348
	245.076	255.303	0.0225719	0.02707	0.024821	0.00224903	0.0300227	0.0351813	0.032602	0.00364766
	255.303	265.53	0.024221	0.0237618	0.0239914	0.000229563	0.0301783	0.0356312	0.0329048	0.0038558
	265.53	275.758	0.0132463	0.0256317	0.019439	0.00619269	0.0379324	0.0315494	0.0347409	0.00451344

## Sheet: Fig 7f
>> Quantification of centrosome number (using gtubulin staining) at the VZ of the cortex
Centrosomes within 15 um away from the ventricular surface were considered
		p53 KO Control					p53 KO Control						p53 KO Control				p53 ko control					p53 /Haus6 double KO					p53 /Haus6 double KO						p53/Haus6 double KO				p53/Haus6 double KO
	Embryo #:	p53 Ctr - 1					p53 Ctr - 2						p53 Ctr - 3				p53 Ctr - 4					1					2						3				4
	Section #:	p53 Ctr - 1.1		p53 Ctr - 1.2		Average	p53 Ctr - 2.1		p53 Ctr - 2.2		Average		p53 Ctr - 3.1	p53 Ctr - 3.2			p53 Ctr - 4.1	p53 Ctr - 4.2				2nd cut		3rd cut		Average	2nd cut		3rd cut		Average
	Section region:	#1	#2	#1	#2		#1	#2	#1	#2			-	-	Average		-	-	Average			region1	region 2	region1	region 2		region1		region 1	region 2
	# centrosomes	103	113	84	80		191	204	224	132			85	152			176	149				30	20	59	36		38		46	32			77	78	Average		74	75	Average
	column width (um):	51.841	54.733	50.17	47.68		83.67	85.819	88.211	63.007			56.4	72.3			84.139	75.2				84.978	78.288	138.036	105.813		158.541		162.391	158.405			90.3	108.7			74.4	71
	# centrosomes / 100 um column width:	198.684	206.457	167.431	167.785	185.089	228.278	237.71	253.937	209.501	232.356		150.709	210.235	180.472		209.178	198.138	203.658			35.3033	25.5467	42.7425	34.0223	34.4037	23.9686		28.3267	20.2014	24.1655		85.2713	71.7571	78.5142		99.4624	105.634	102.548
>> DATA SUMMARY
	Centrosome density # centrosomes / 100 um column width:
	Embryo #	p53 KO Control	Haus6 cKO; p53 KO
	1	185.089	34.4037
	2	232.356	24.1655
	3	180.472	78.5142
	4	203.658	102.548
	Average	200.394	59.9079
	St Dev	23.5467	36.934
	t.test. P-value	0.000677352	***
