# Supplementary material for: Augmin deficiency in neural stem cells causes p53-dependent apoptosis and aborts brain development
Source: eLife journal article supplement (doi:10.7554/elife.67989), 2021-08-24

Figure 1-figure supplement 1-Source Data 1

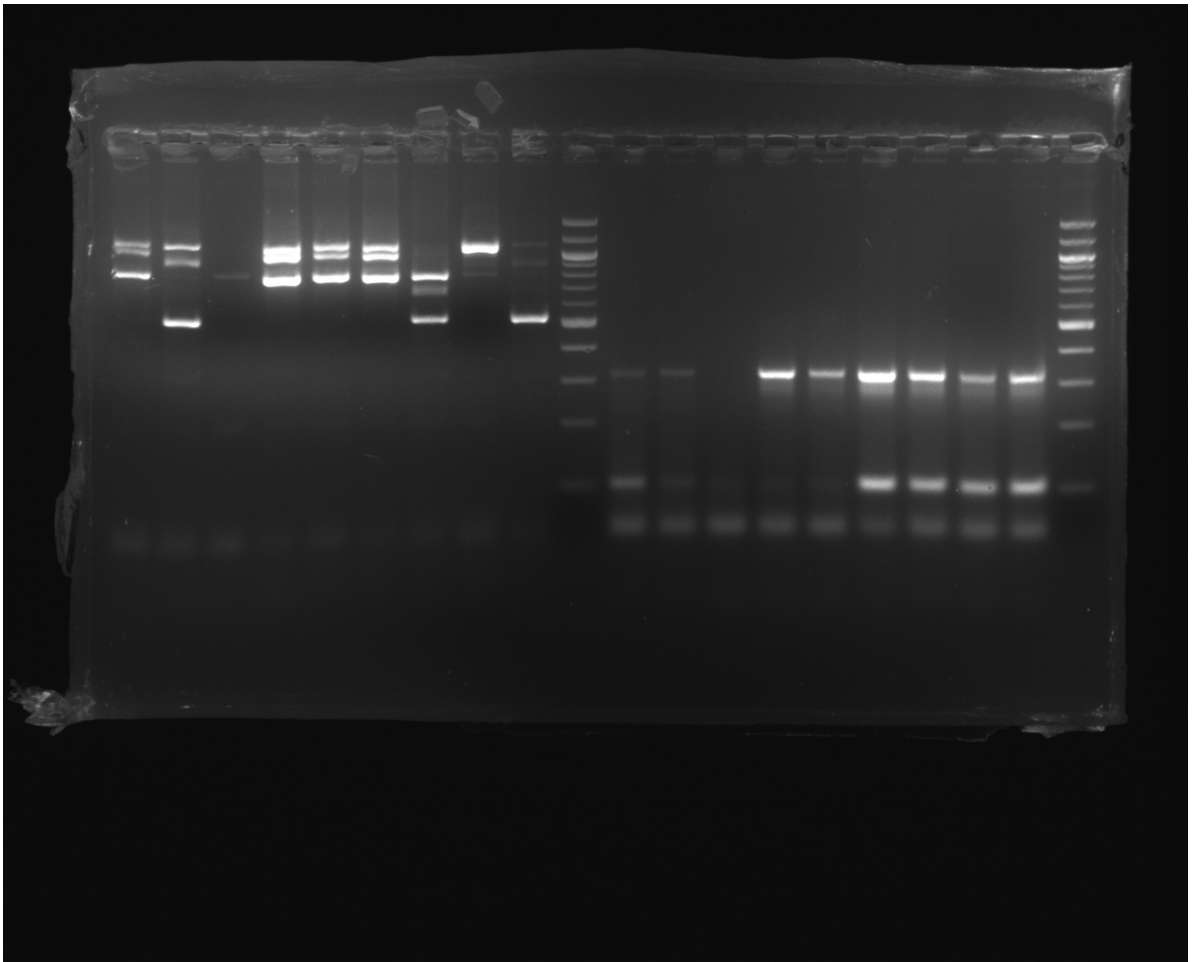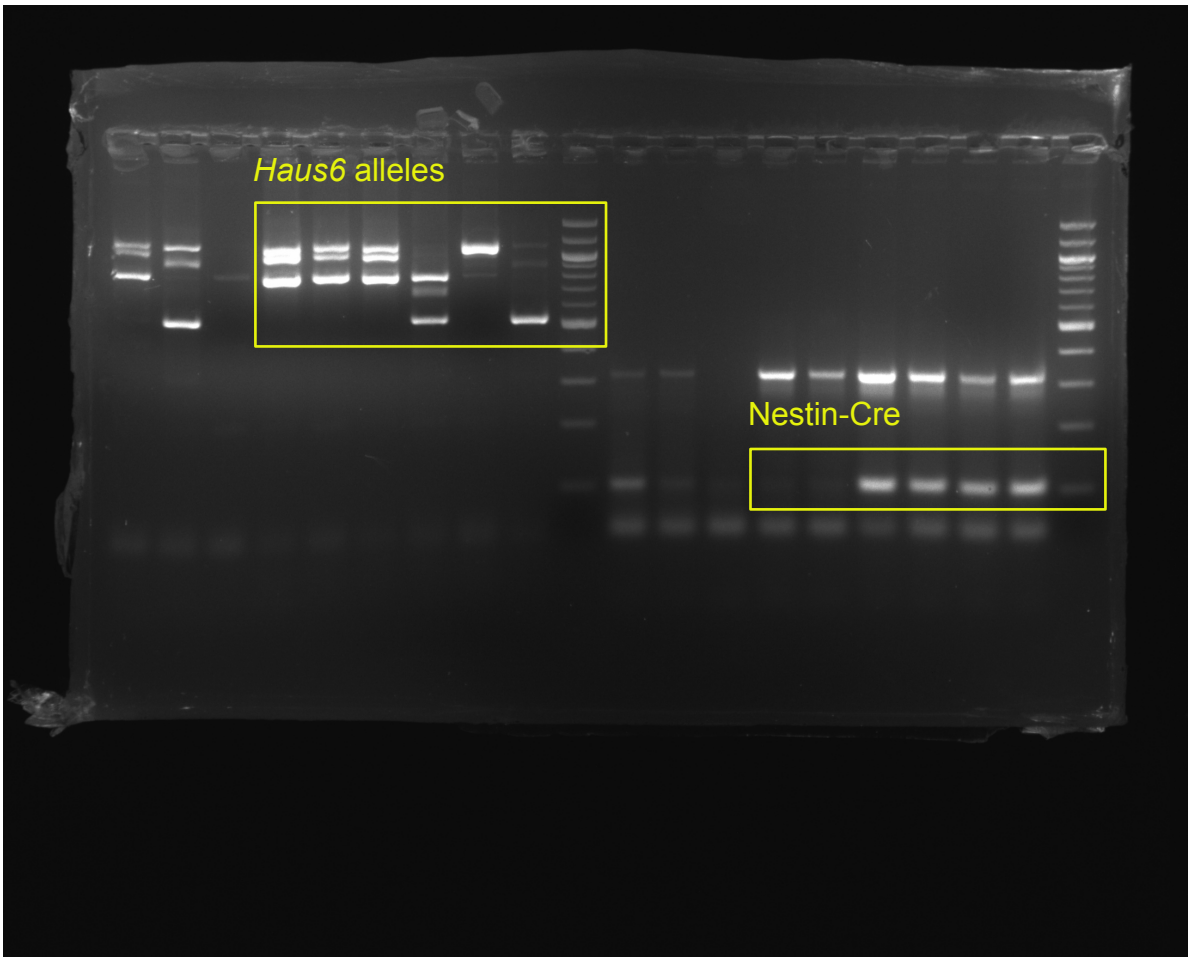

Supplement: supp [file elife-67989-supp-v1.zip]
