# Supplementary material for: Augmin deficiency in neural stem cells causes p53-dependent apoptosis and aborts brain development
Source: eLife journal article supplement (doi:10.7554/elife.67989), 2021-08-24

**Figure 2-figure supplement 2**

**a**

Cortex (E11.5)

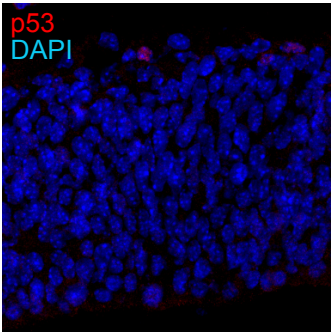

Control

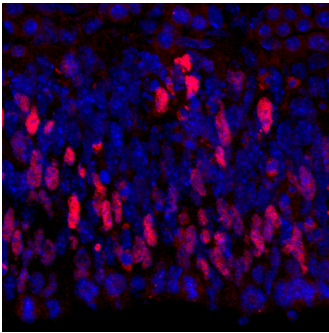

*Haus6* cKO

Cortex (E11.5)

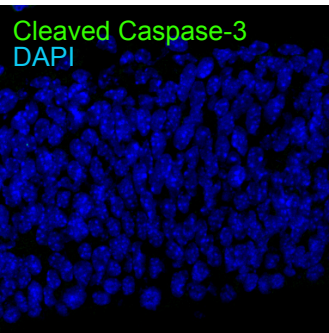

Control

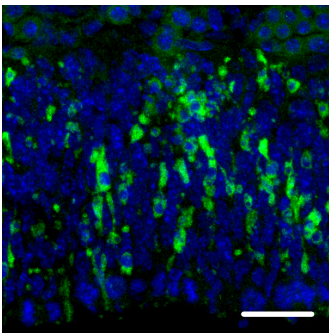

*Haus6* cKO

VS

**b**

Thalamus (E13.5)

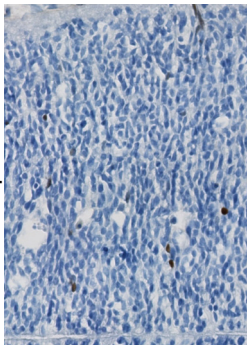

Control

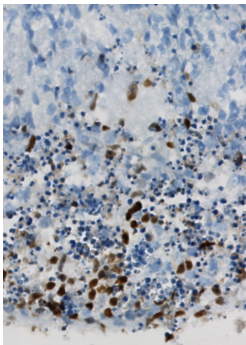

*Haus6* cKO

p21

**c**

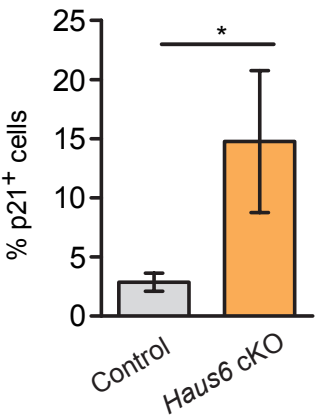

Supplement: supp [file elife-67989-supp-v1.zip]
