# Supplementary figures and images for: Augmin deficiency in neural stem cells causes p53-dependent apoptosis and aborts brain development
Source: eLife journal article supplement (doi:10.7554/elife.67989), 2021-08-24

**Figure 7-figure supplement 2**

**a**

Cortex (E13.5)

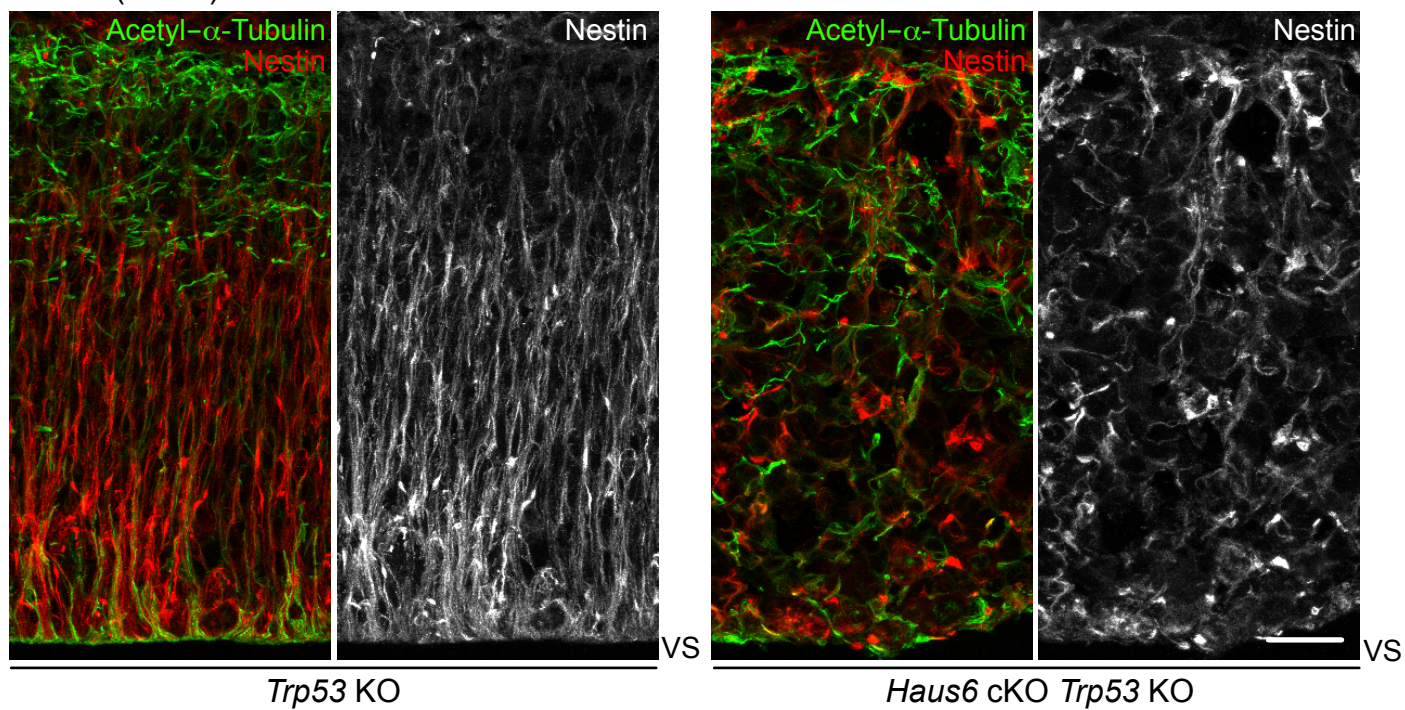

**b**

Cortex (E13.5)

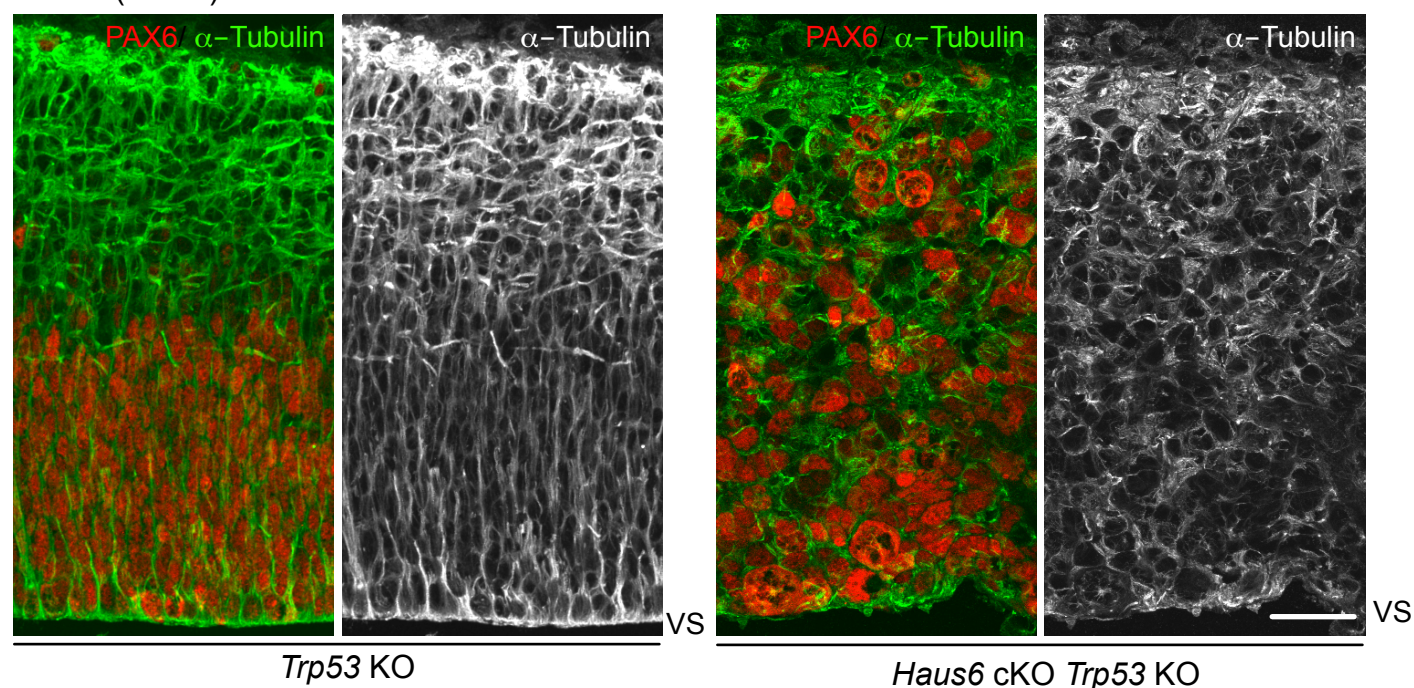

**c**

$\alpha$ -Tubulin

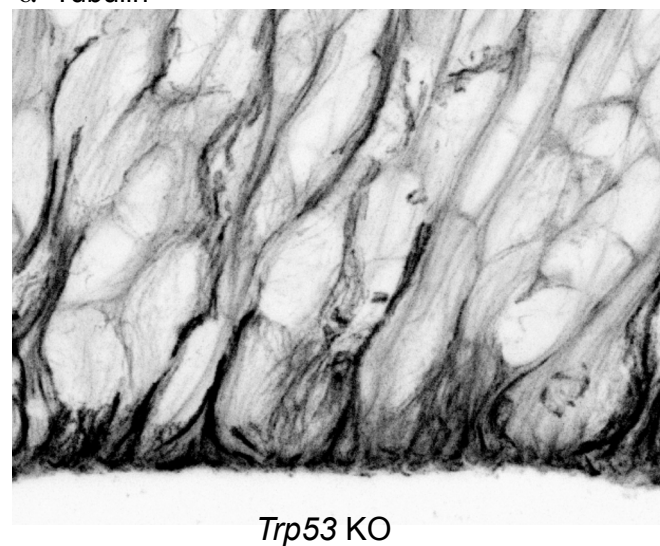

$\alpha$ -Tubulin

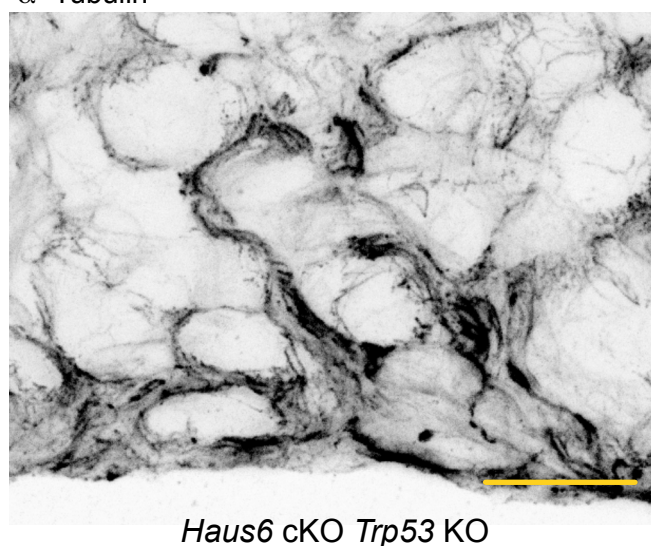

Supplement: supp [file elife-67989-supp-v1.zip]

**Figure 2-figure supplement 1**

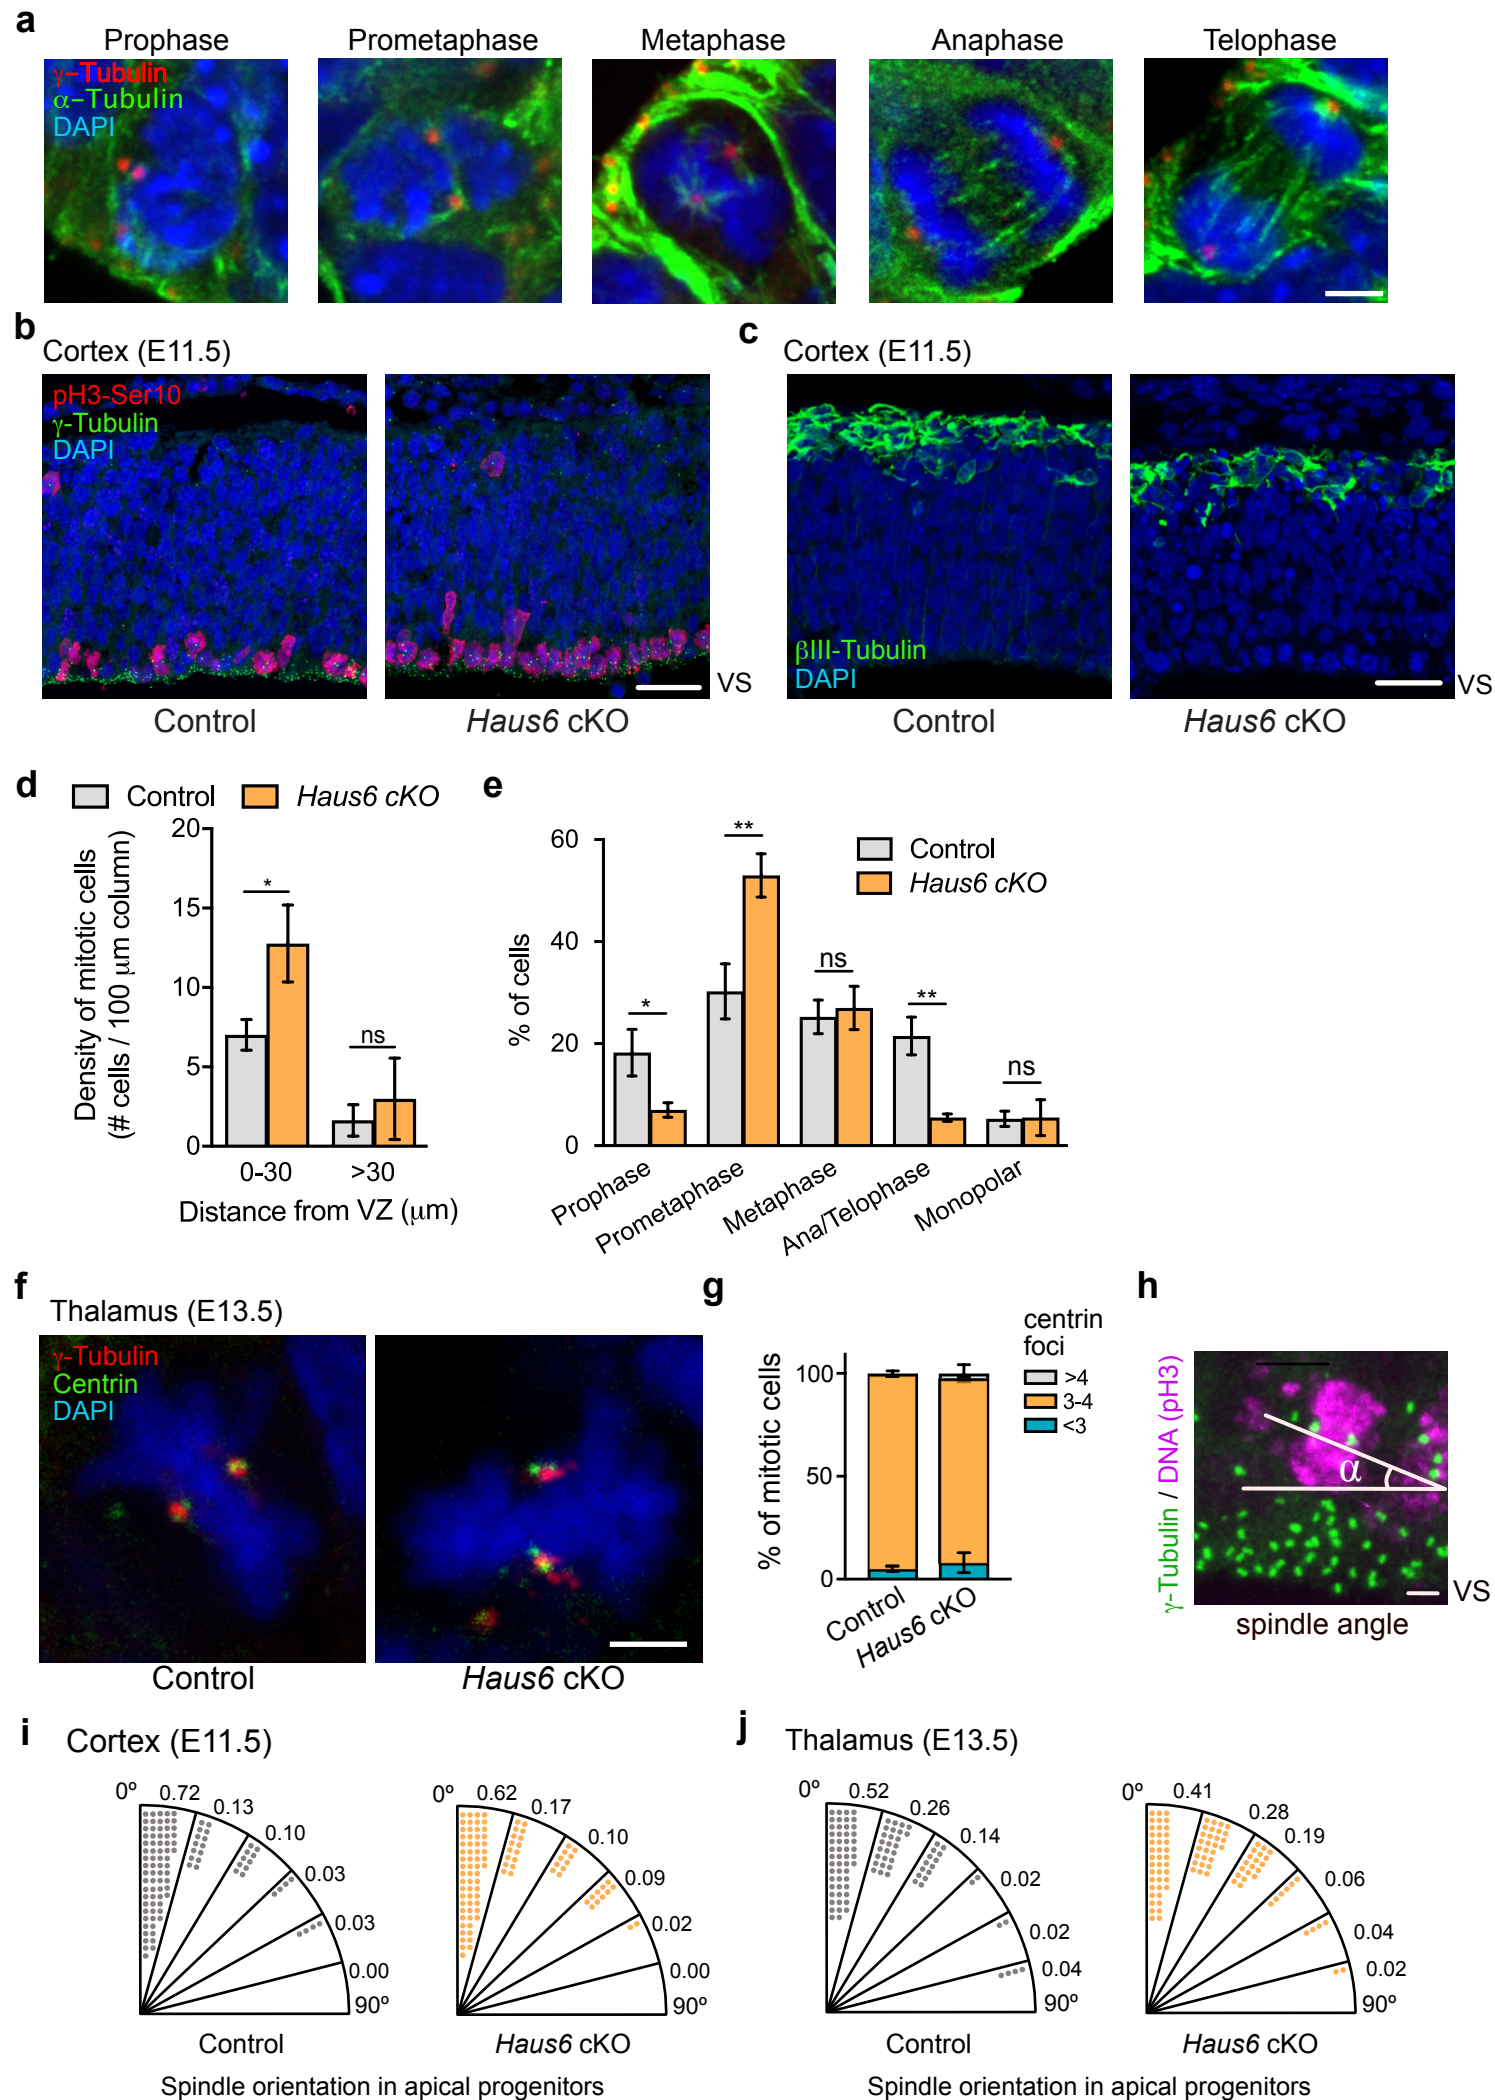

Supplement: supp [file elife-67989-supp-v1.zip]

**Figure 3-figure supplement 1**

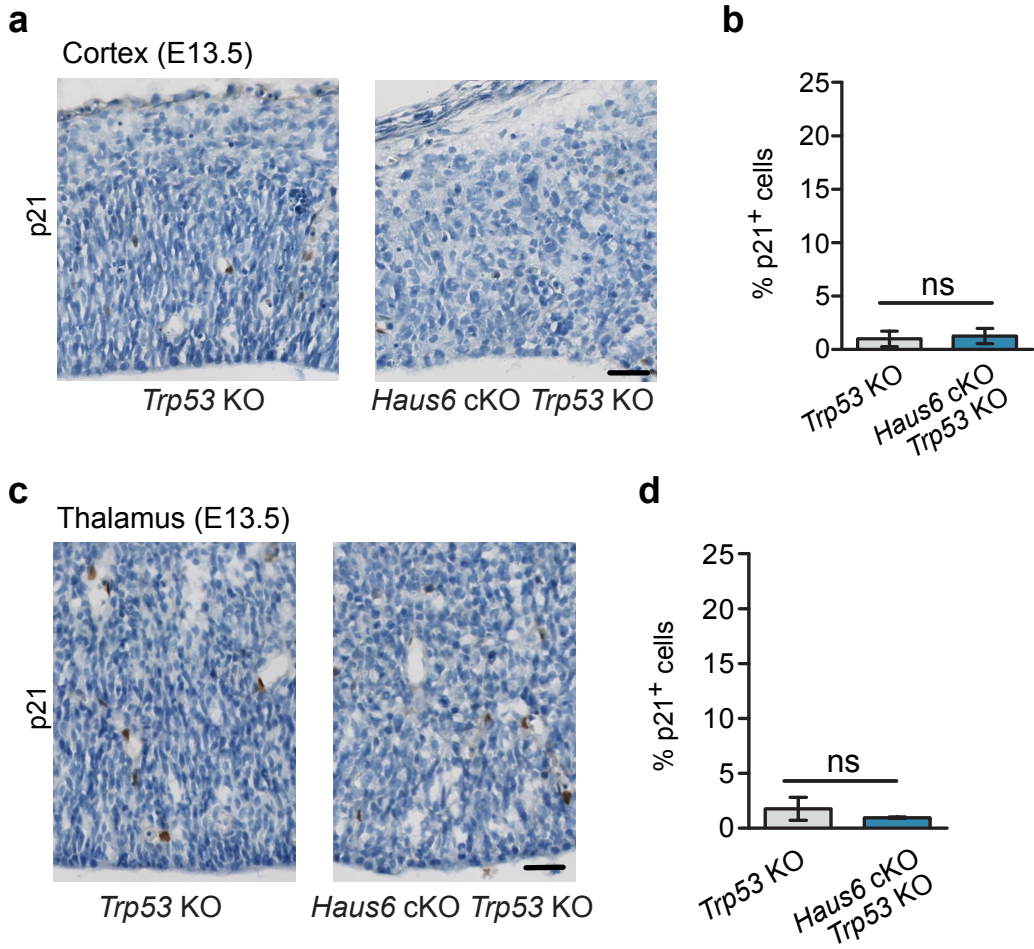

Supplement: supp [file elife-67989-supp-v1.zip]

## Figure 7-figure supplement 1

**a**

Cortex (E13.5) *Haus6* cKO *Trp53* KO

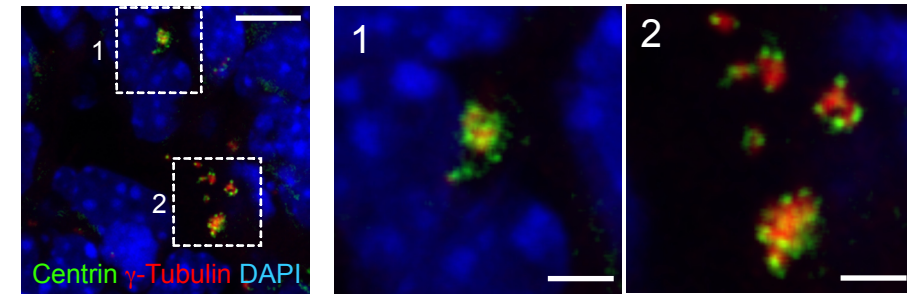

Supplement: supp [file elife-67989-supp-v1.zip]

Figure 1-figure supplement 1

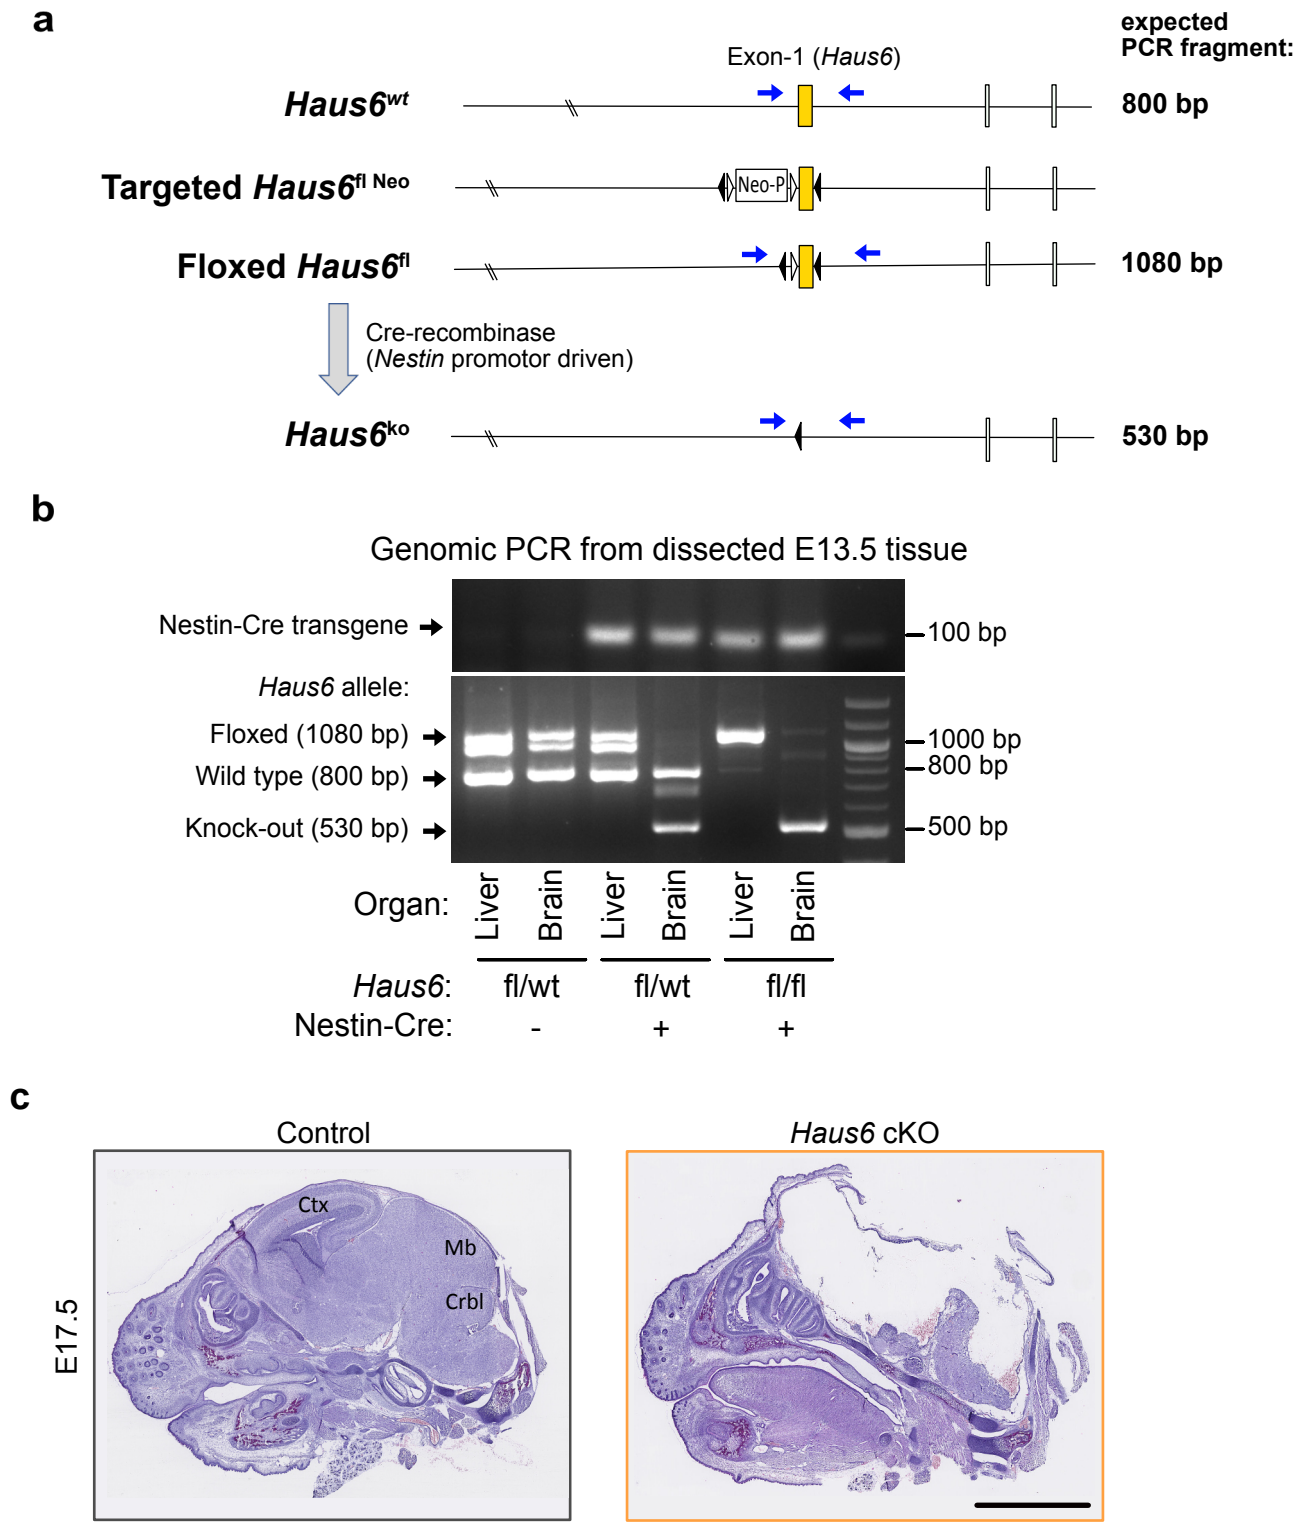

Supplement: supp [file elife-67989-supp-v1.zip]

**Figure 4-figure supplement 1**

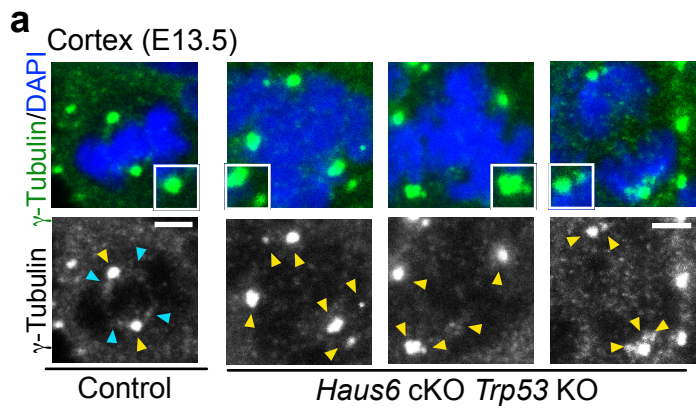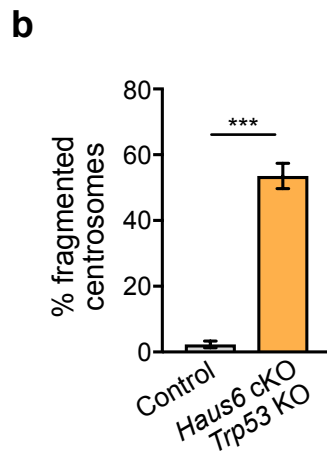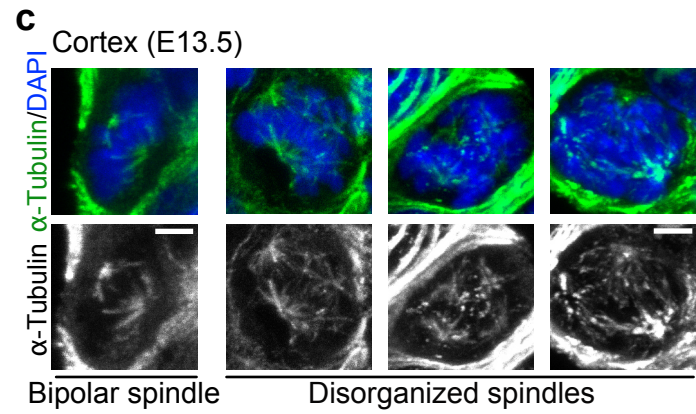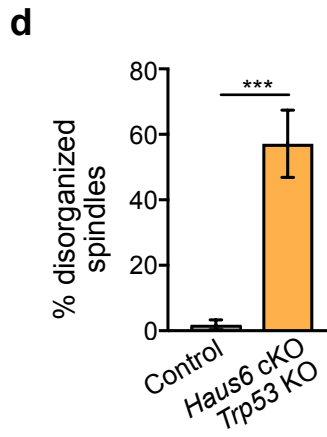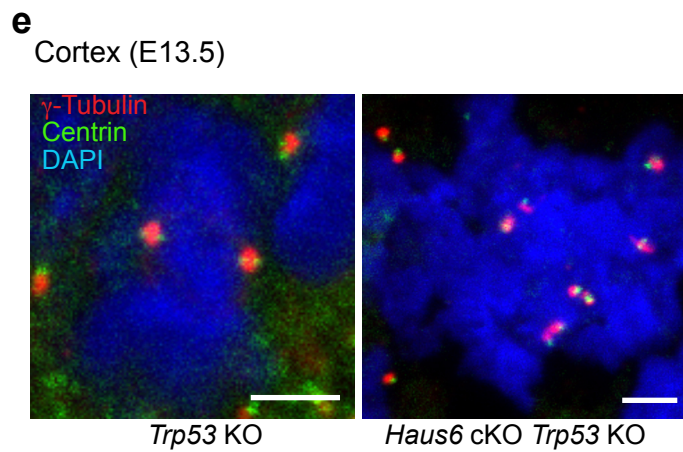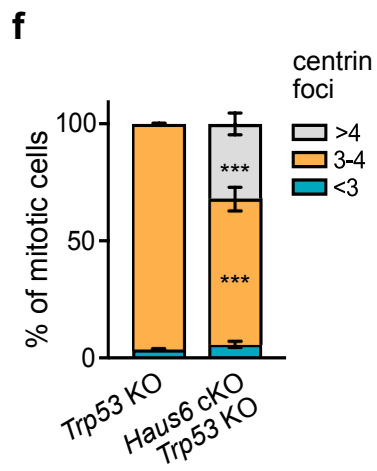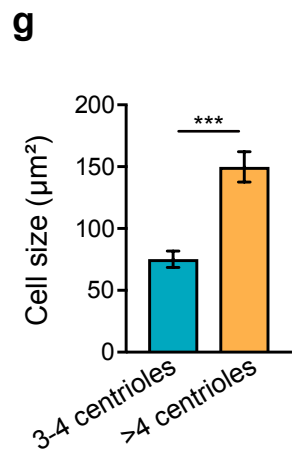

Supplement: supp [file elife-67989-supp-v1.zip]
